# Supplementary material for: Antifungal Activity of New Eugenol-Benzoxazole Hybrids against Candida spp.
Source: Hindawi journal article supplement (doi:10.1155/2017/5207439), 2017-01-01

# Antifungal Activity of New Eugenol-Benzoxazole Hybrids against *Candida* spp.

Larissa Incerti Santos de Carvalho<sup>1</sup>, Dalila Junqueira Alvarenga<sup>1</sup>, Letícia Cruz Ferreira do Carmo<sup>1</sup>, Lucas Gomes de Oliveira<sup>1</sup>, Naiara Chaves Silva<sup>2</sup>, Amanda Latércia Tranches Dias<sup>2</sup>, Luiz Felipe Leomil Coelho<sup>2</sup>, Thiago Belarmino de Souza<sup>3</sup>, Danielle Ferreira Dias<sup>3</sup>, Diogo Teixeira Carvalho<sup>1\*</sup>

<sup>1</sup>*Department of Foods and Drugs, Faculty of Pharmaceutical Sciences, Federal University of Alfenas, 37130-001, Alfenas, Brazil*

<sup>2</sup>*Department of Microbiology and Immunology, Institute of Biomedical Sciences, Federal University of Alfenas, 37130-001, Alfenas, Brazil*

<sup>3</sup>*Institute of Chemistry, Federal University of Alfenas, 37130-001, Alfenas, Brazil*

## **SUPPLEMENTARY MATERIAL**

### **INFRARED AND NUCLEAR MAGNETIC RESONANCE SPECTRA**

### 4-allyl-2-methoxy-6-nitrophenol (2)

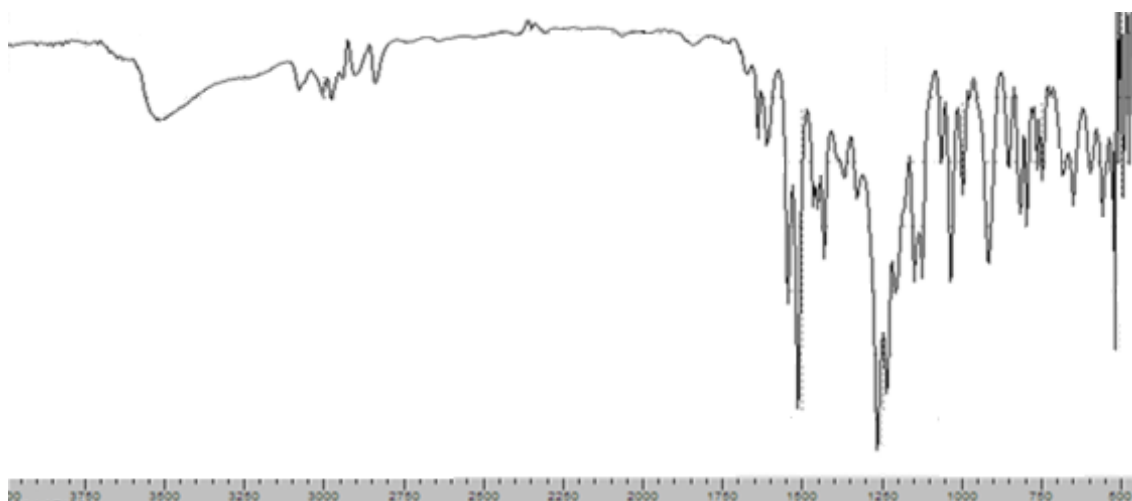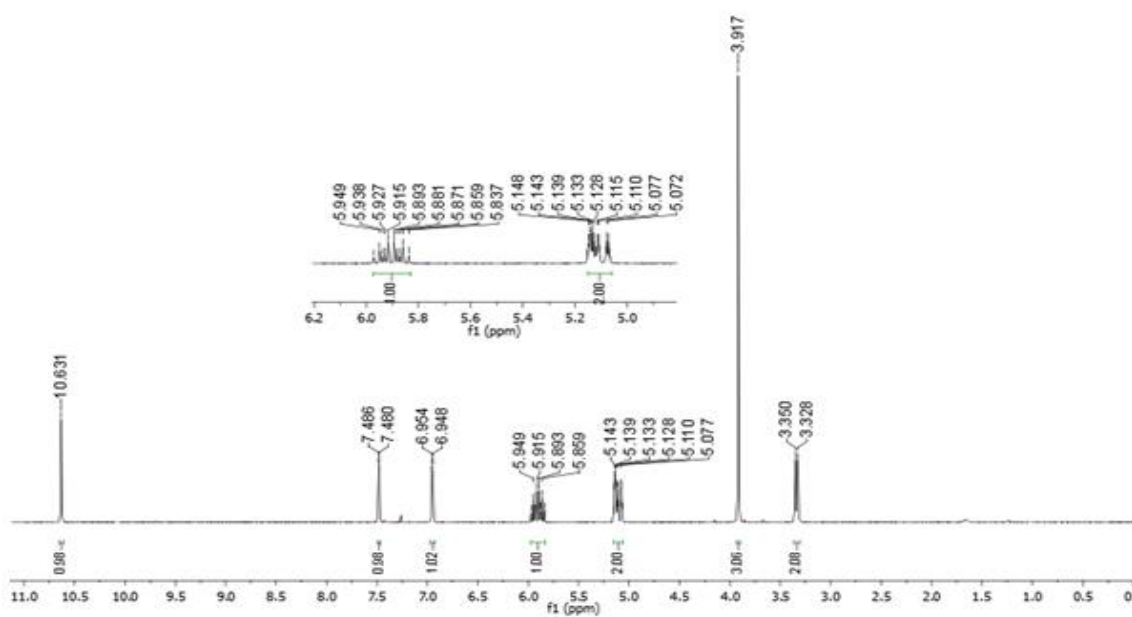

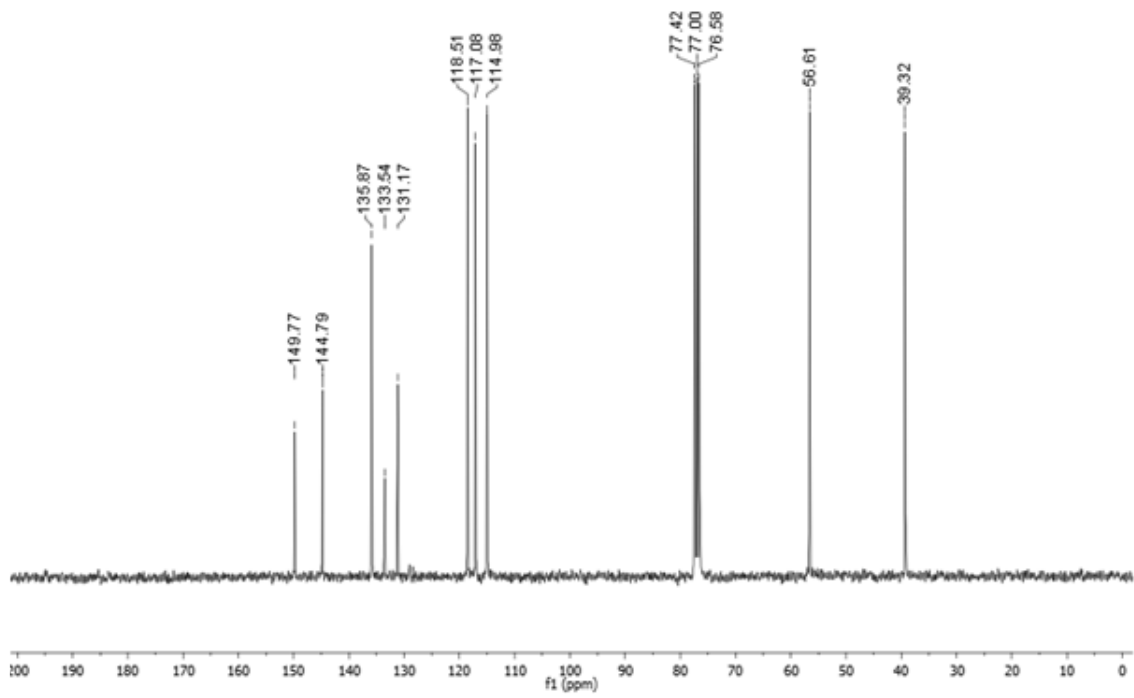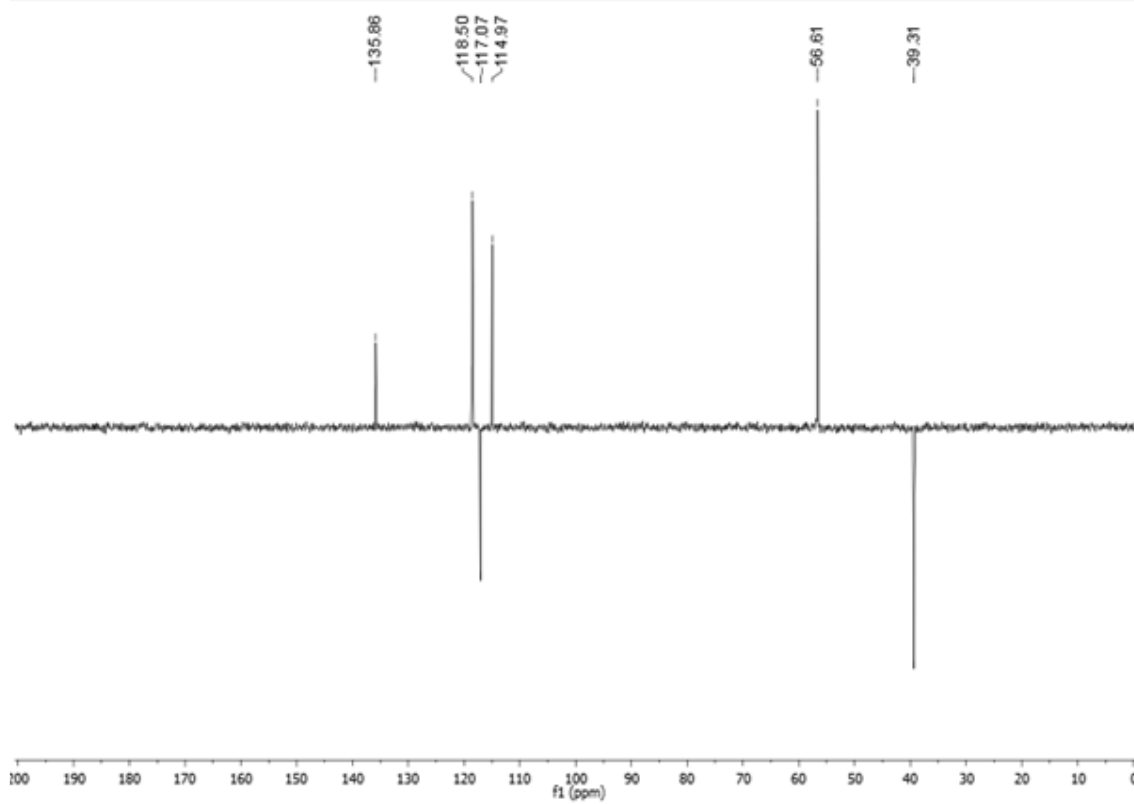

## 2-methoxy-6-nitro-4-propylphenol (2')

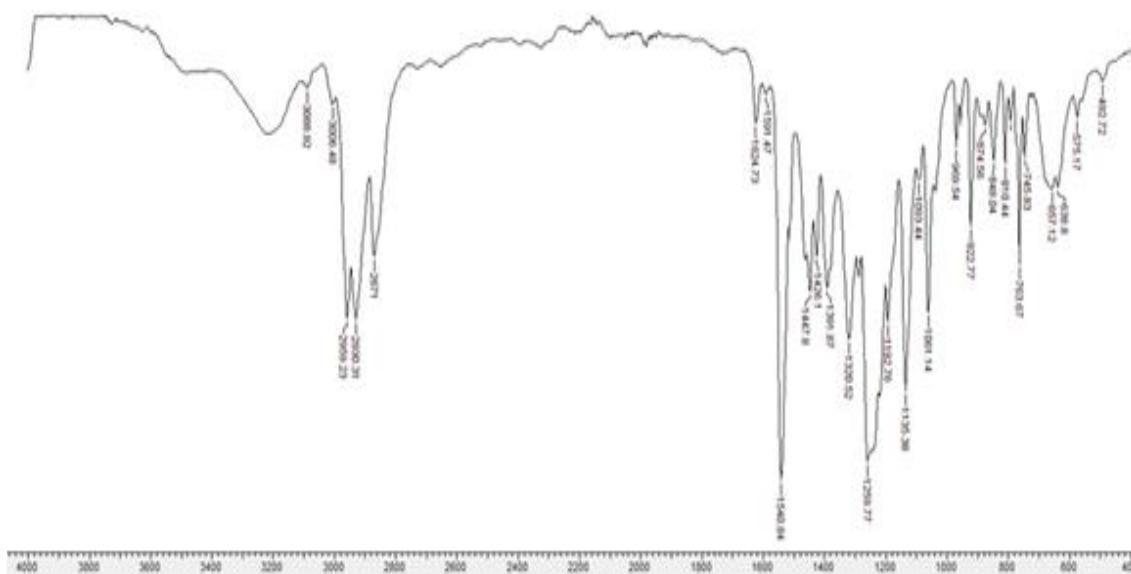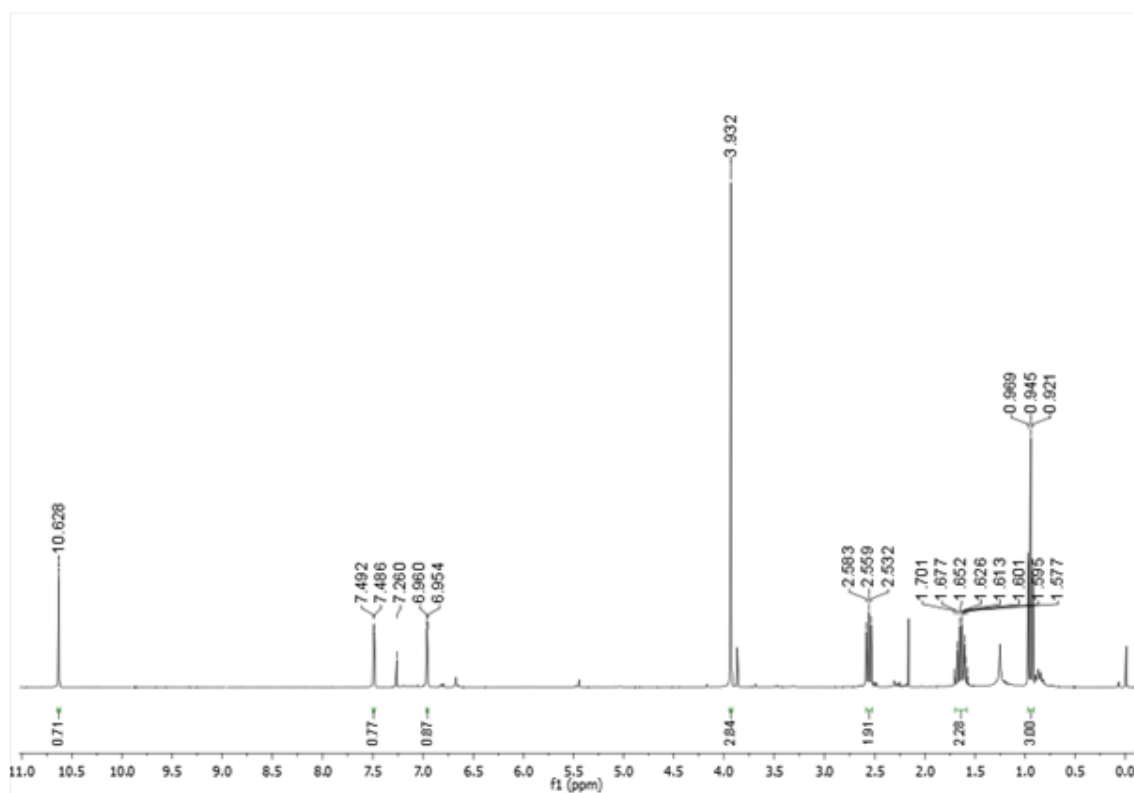

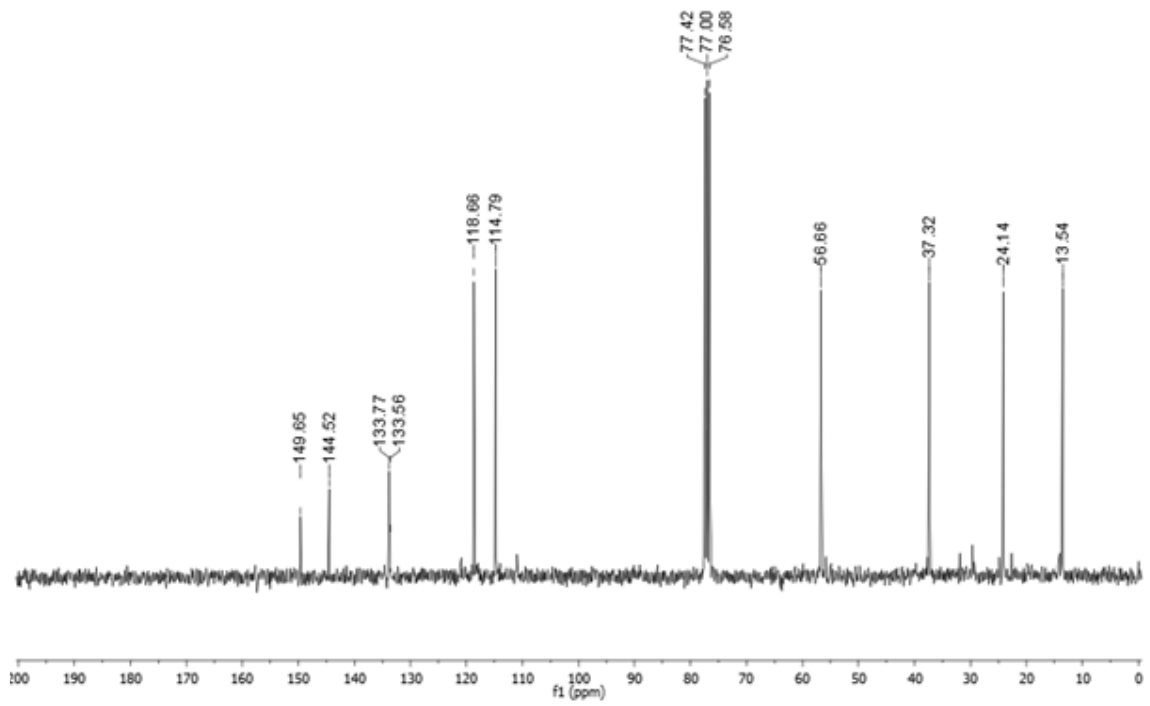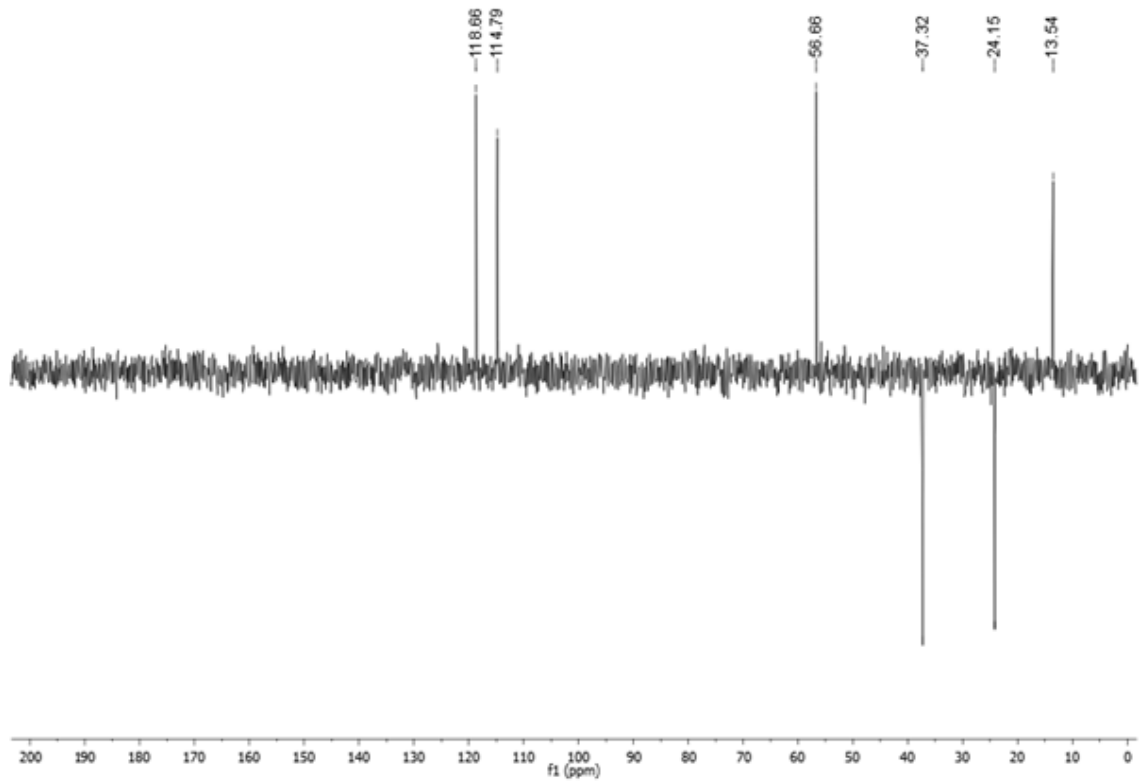

### 4-allyl-2-amino-6-methoxyphenol (3)

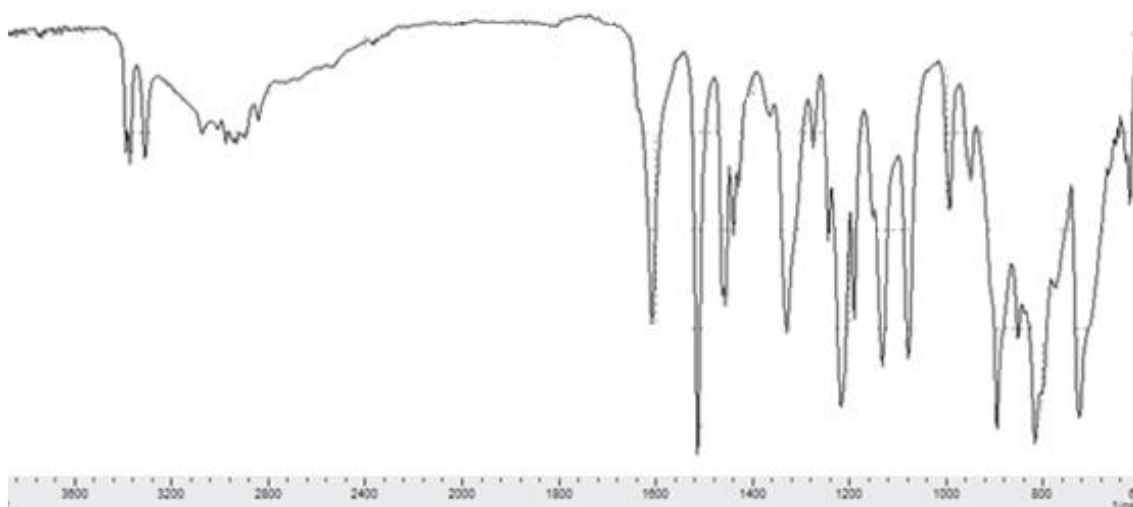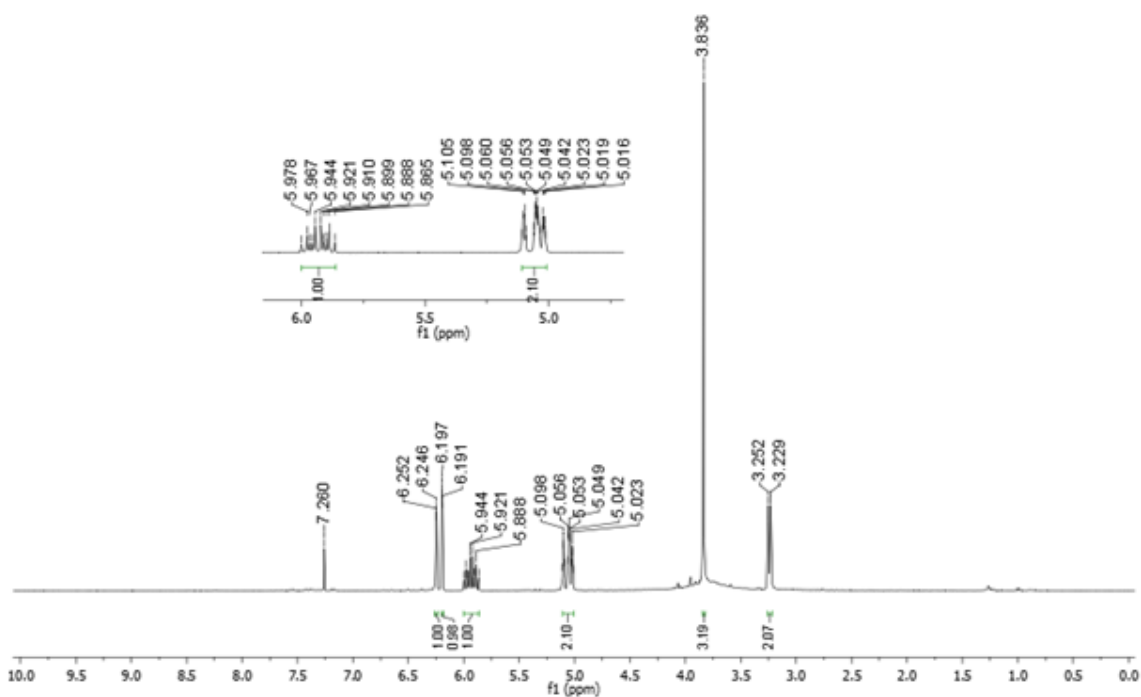

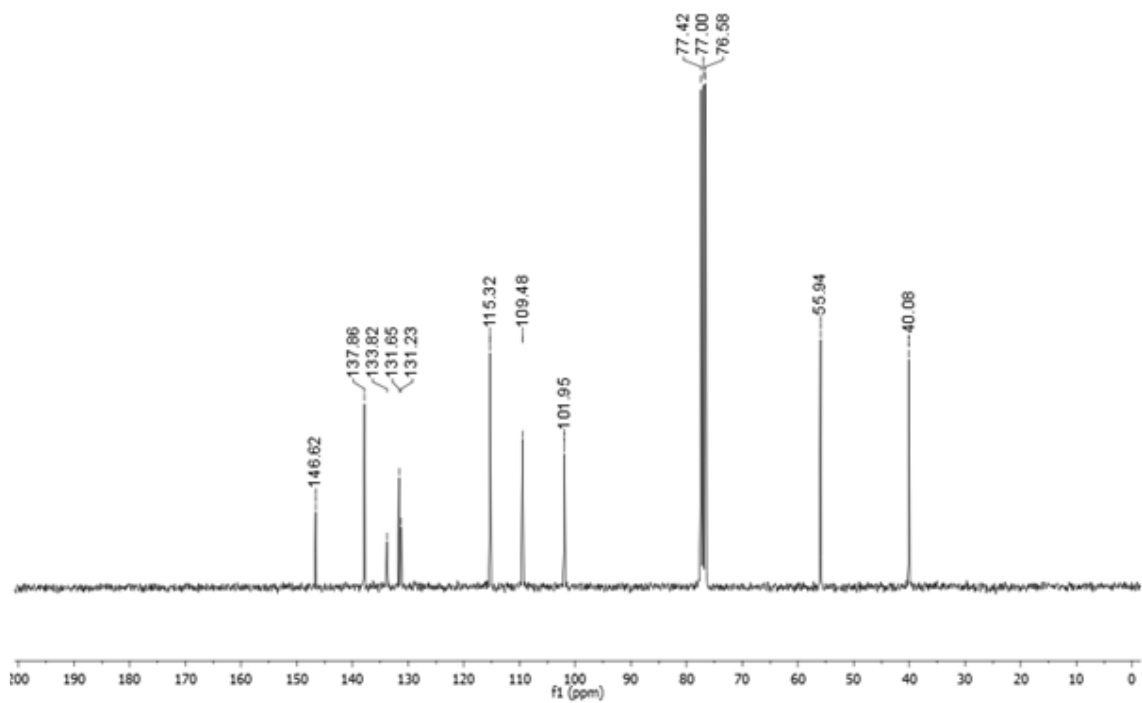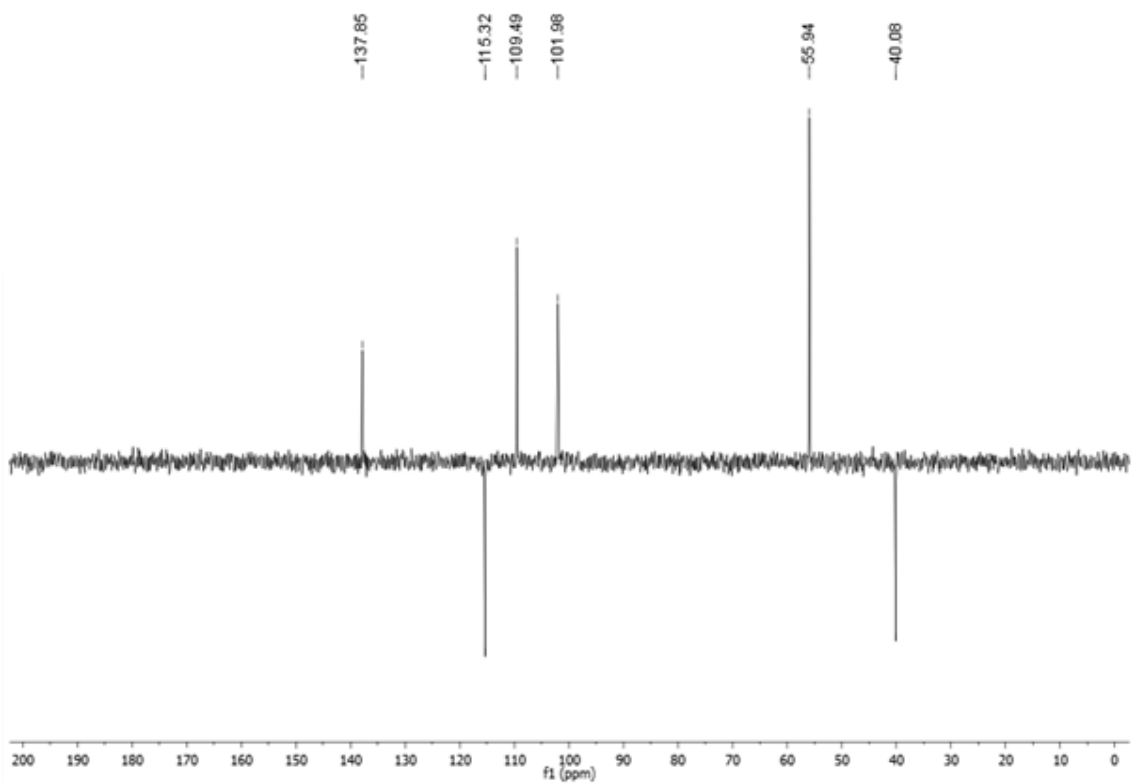

# 2-amino-6-methoxy-4-propylphenol (3')

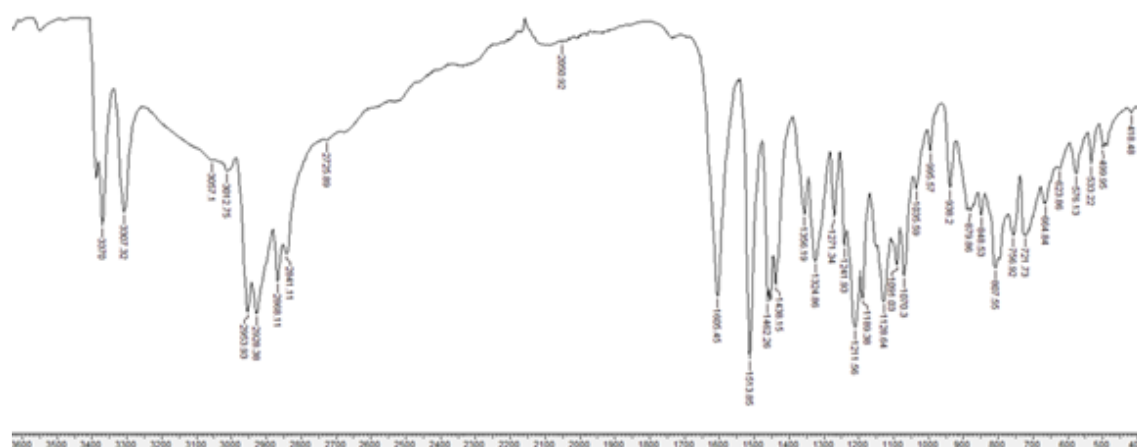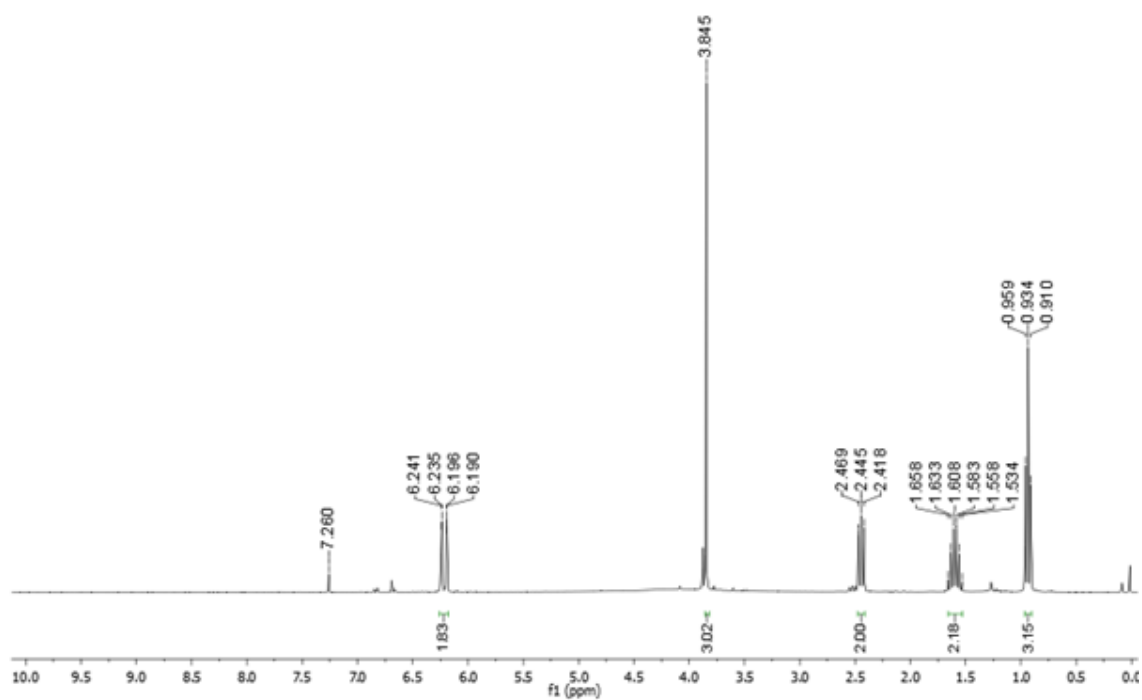



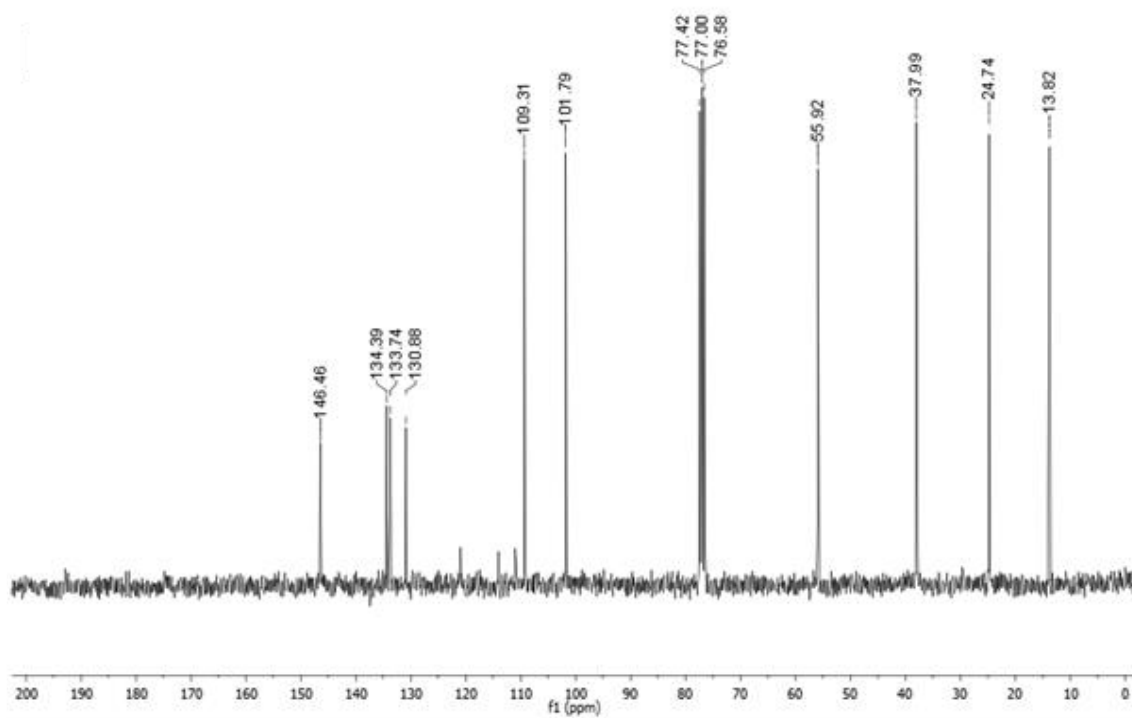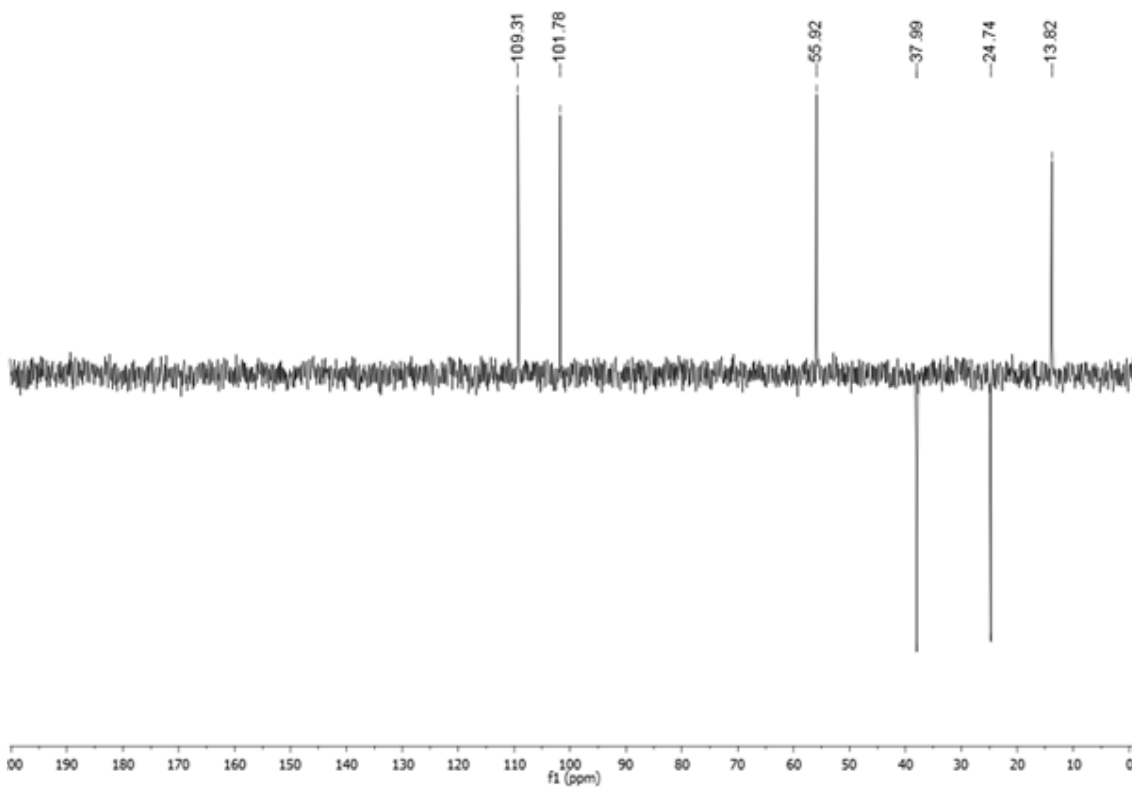

***N*-(5-allyl-2-hydroxy-3-methoxyphenyl)benzamide (4a)**

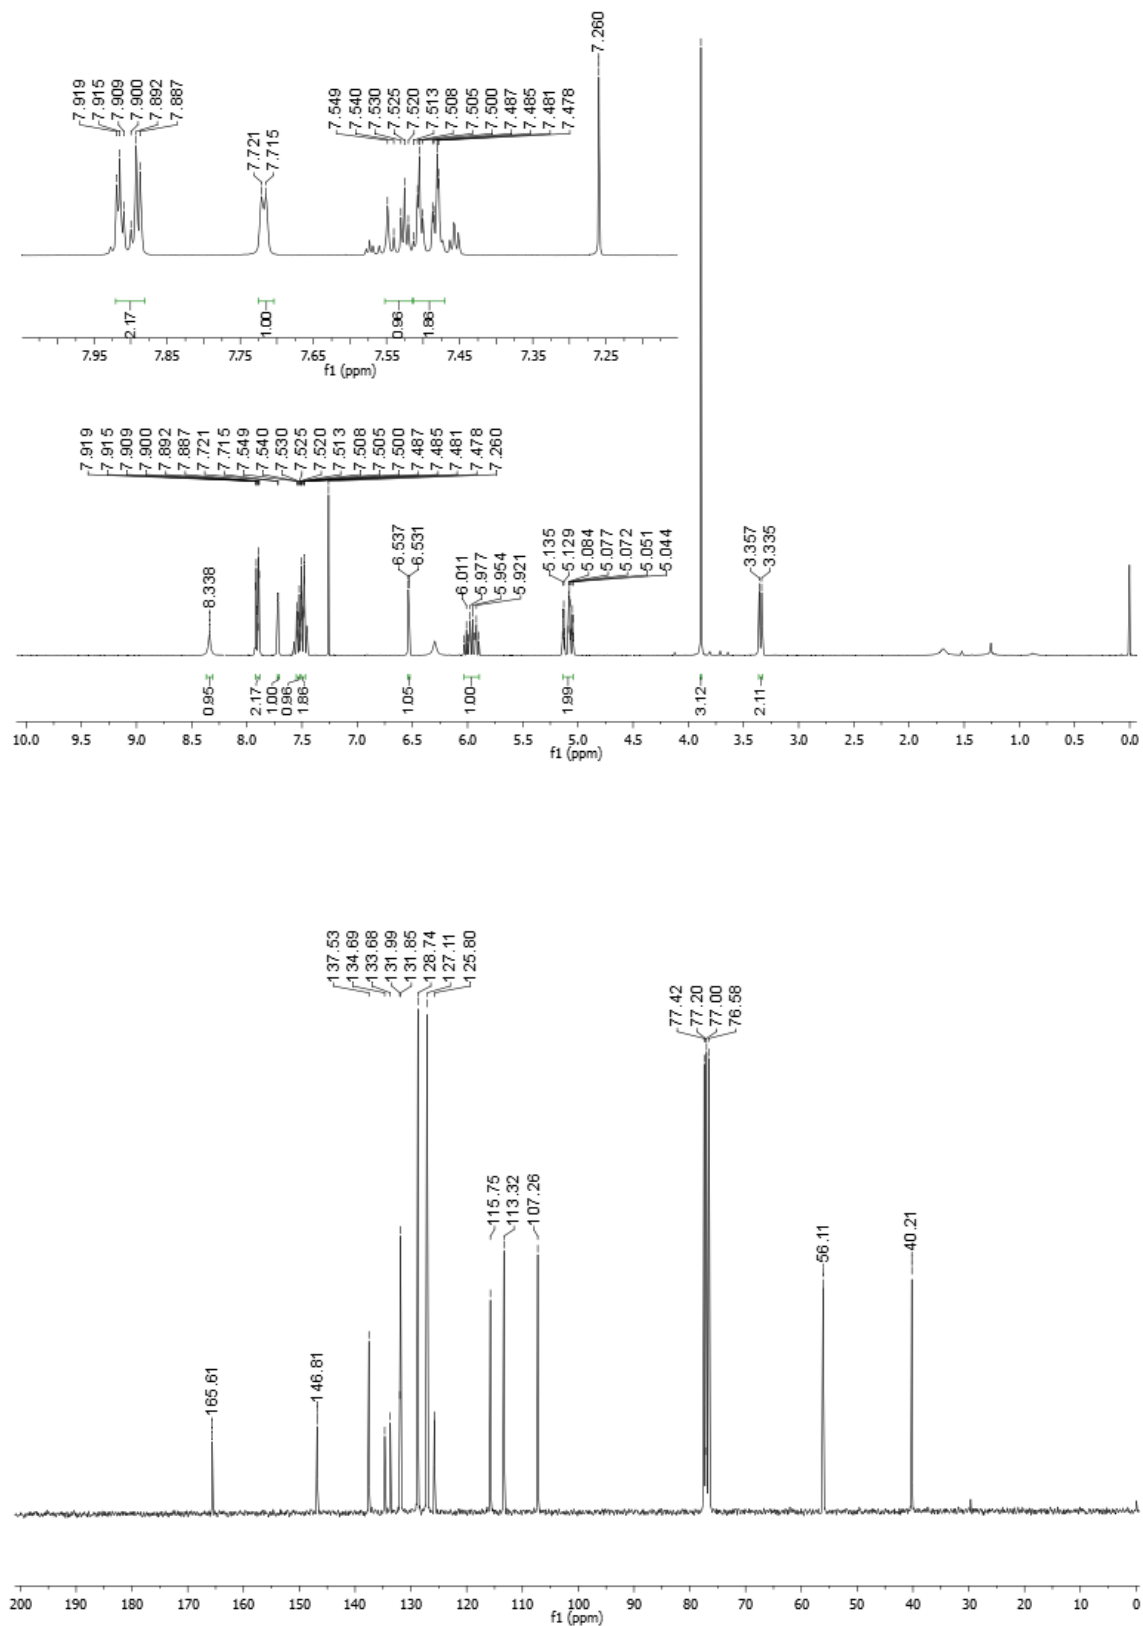

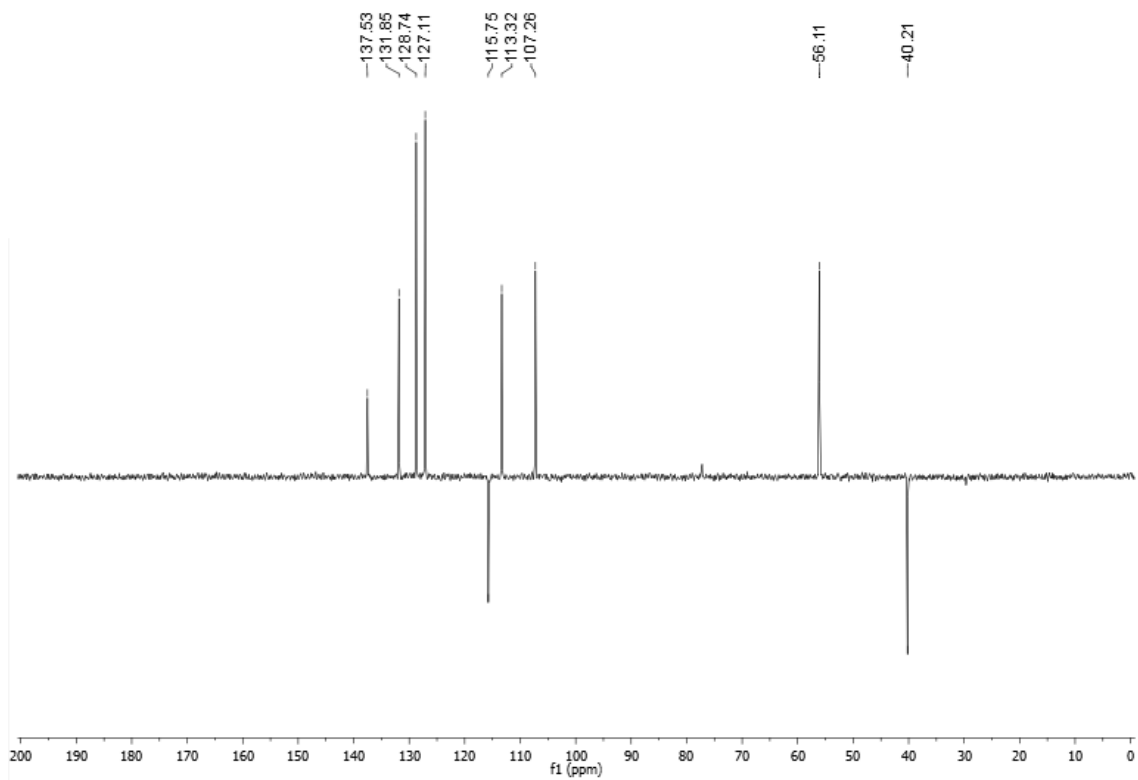

***N*-(5-allyl-2-hydroxy-3-methoxyphenyl)-4-chlorobenzamide (4b)**

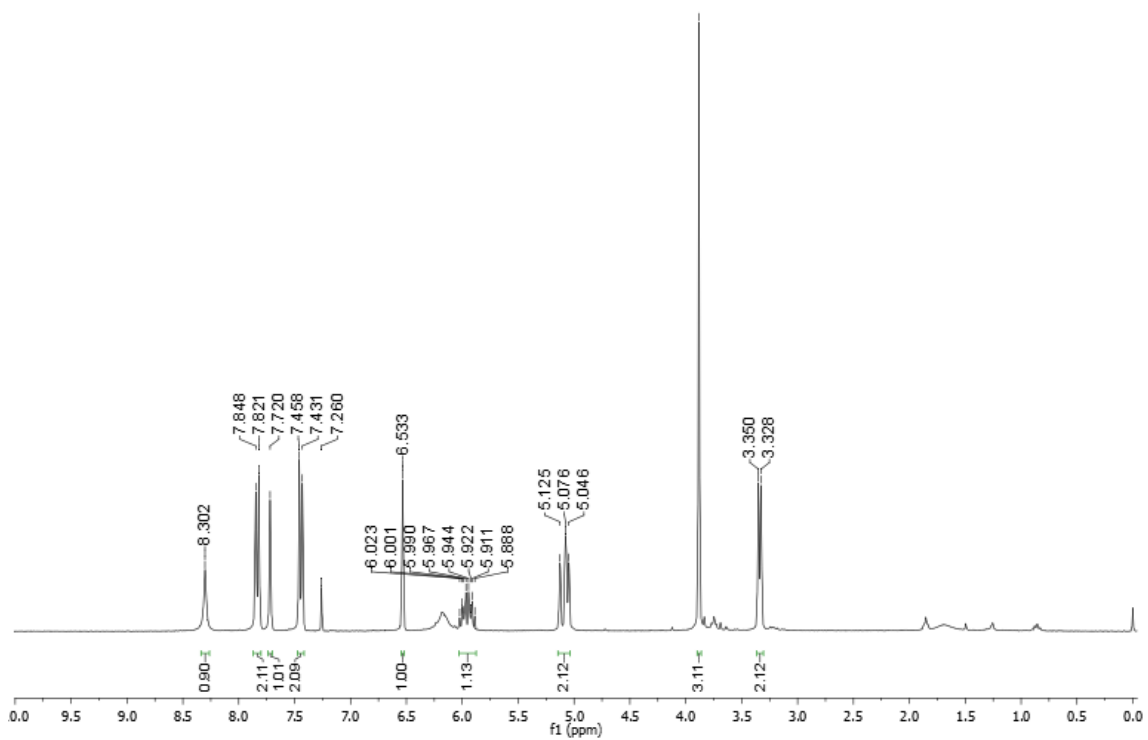

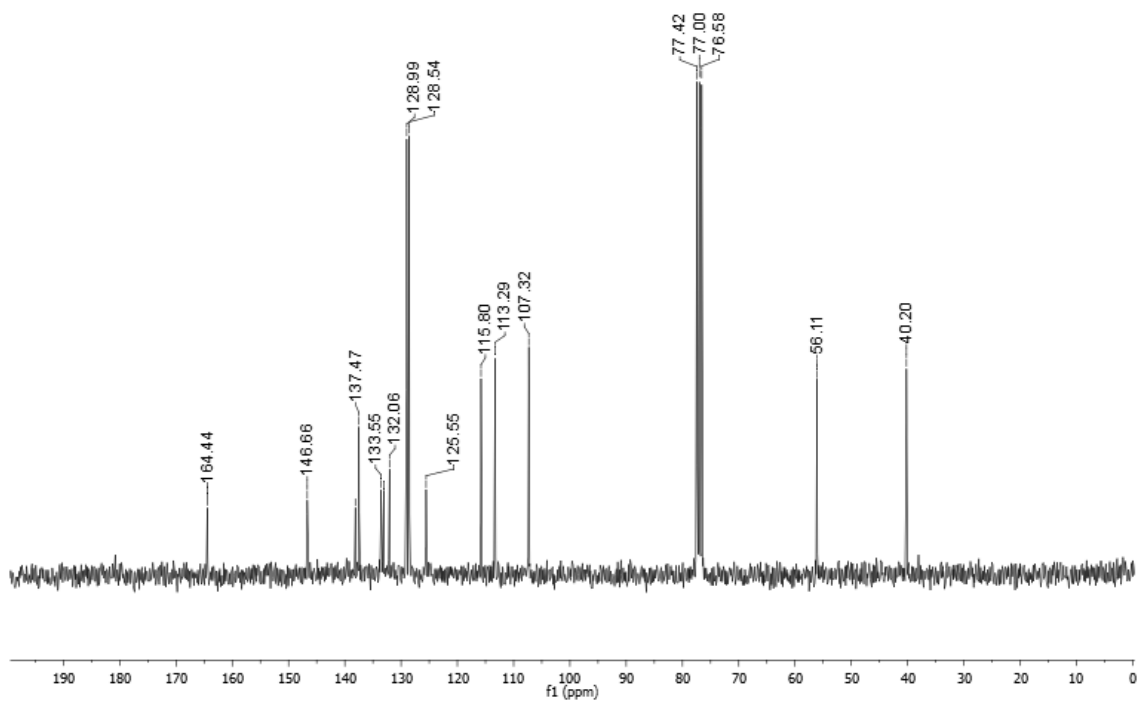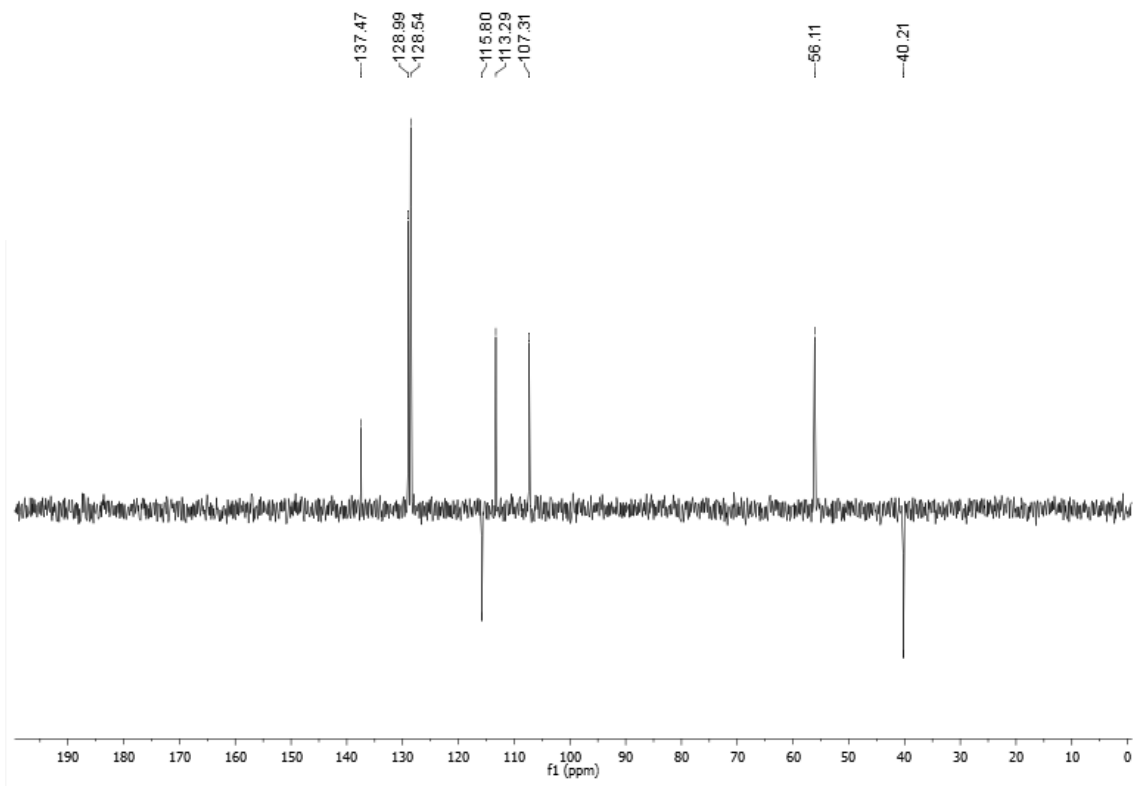

***N*-(5-allyl-2-hydroxy-3-methoxyphenyl)-4-methoxybenzamide (4c)**

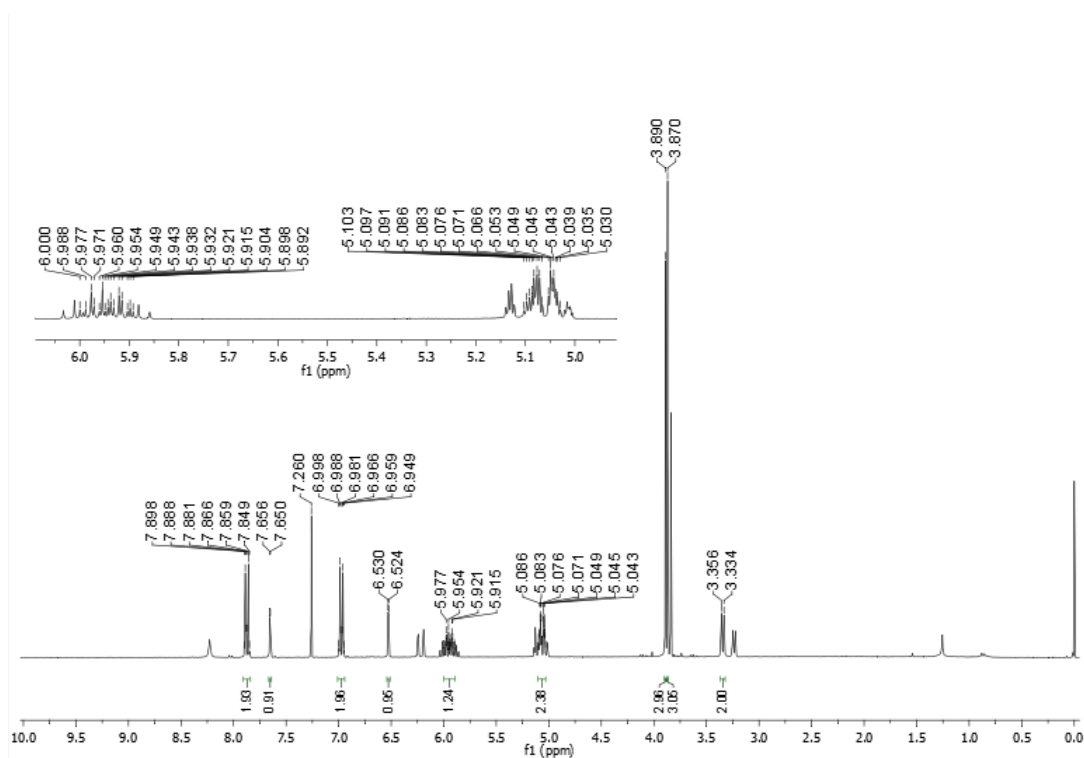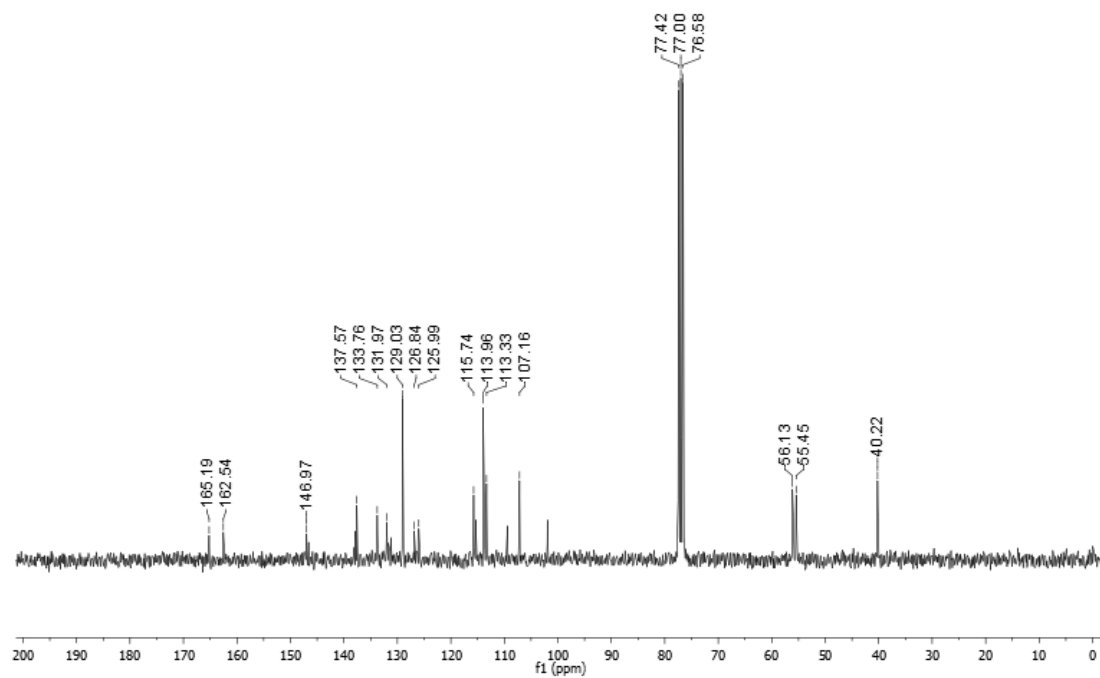

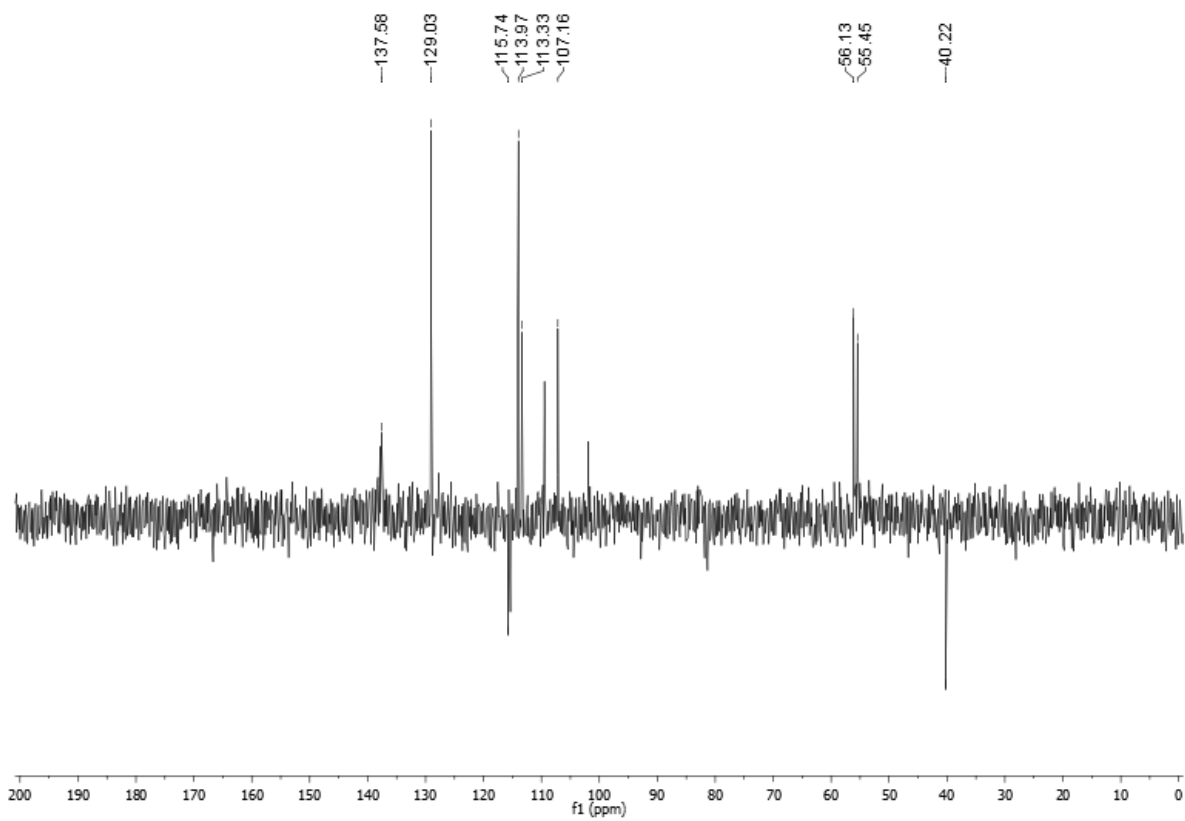

***N*-(5-allyl-2-hydroxy-3-methoxyphenyl)-4-nitrobenzamide (4d)**

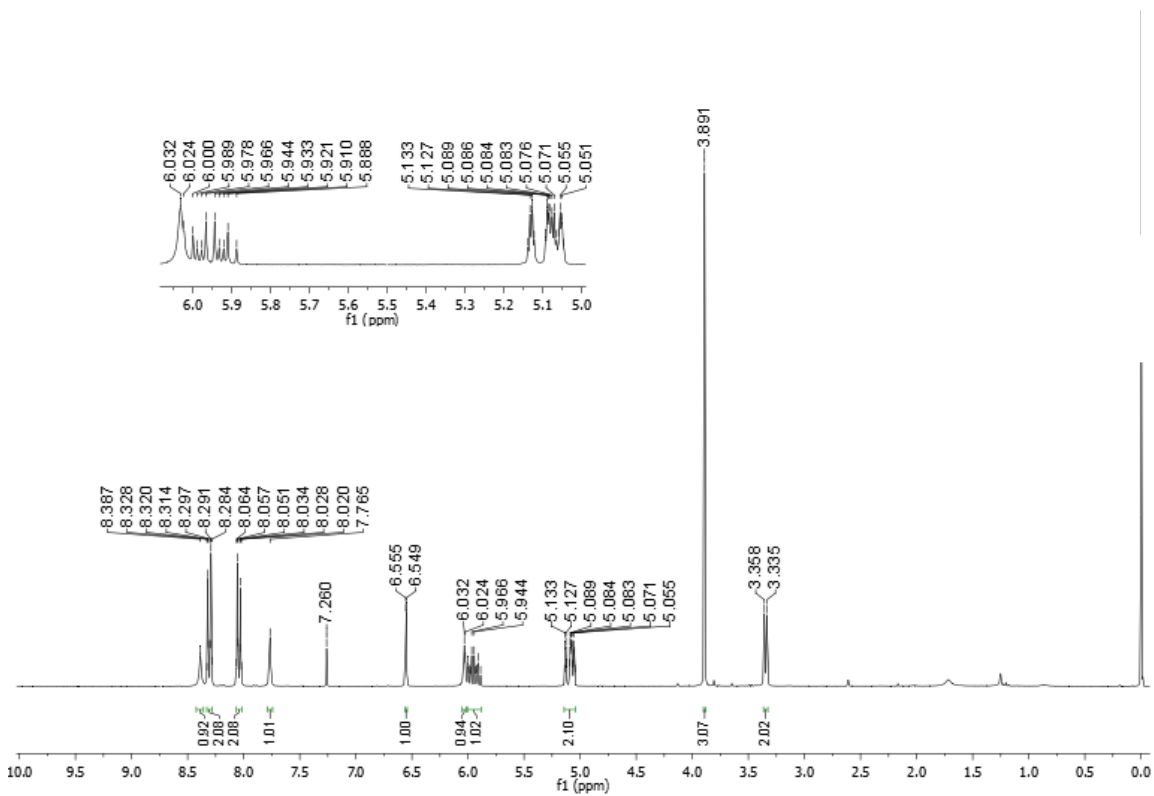

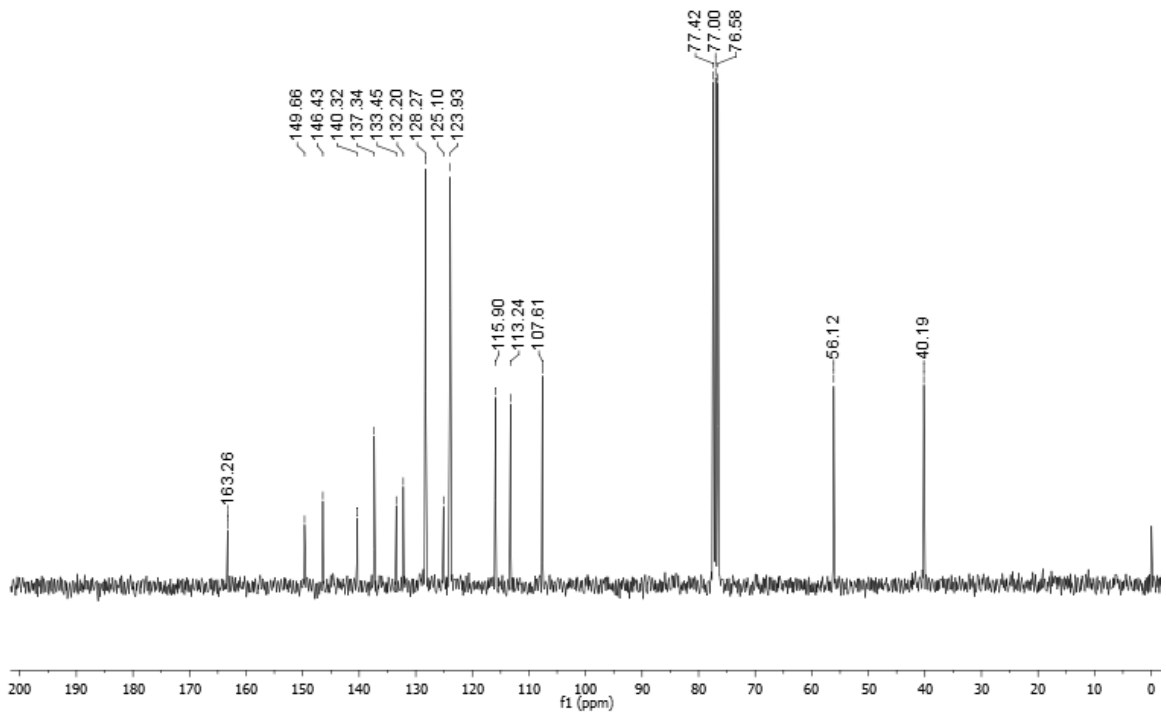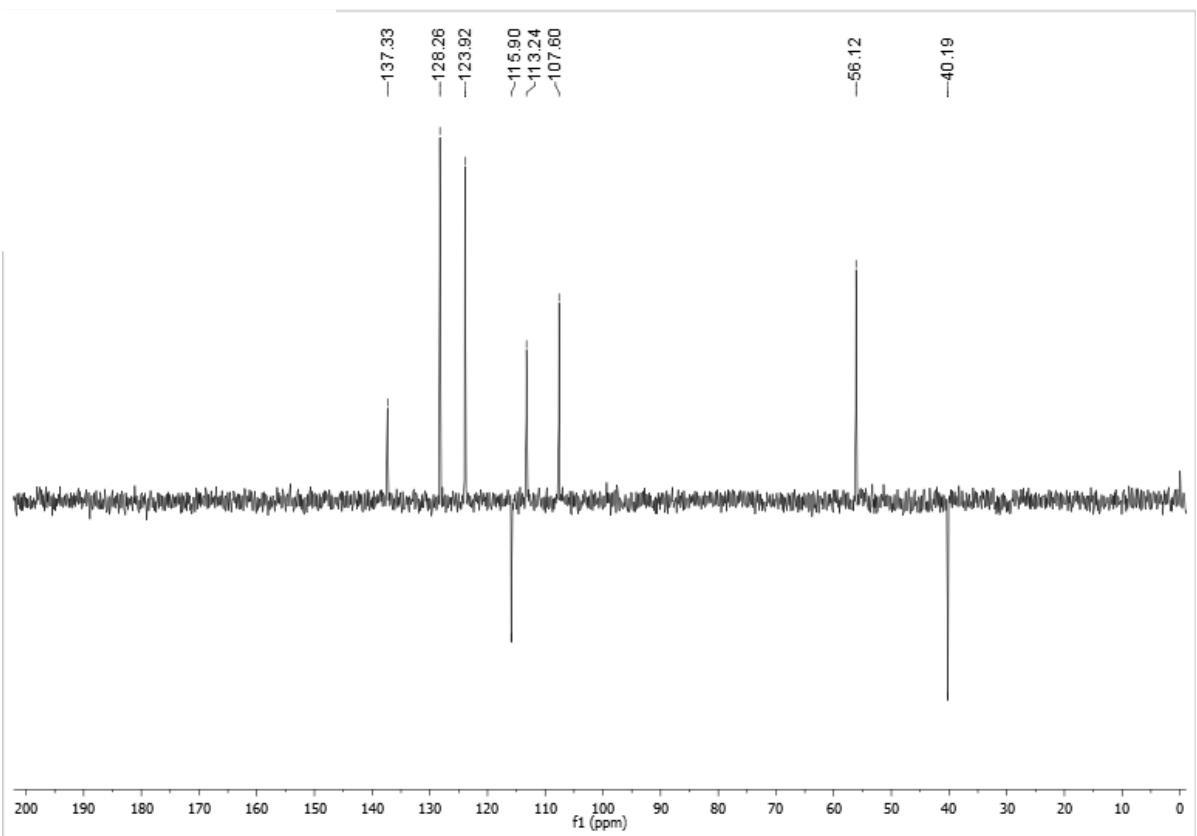

***N*-(2-hydroxy-3-methoxy-5-propylphenyl)benzamide (4a')**

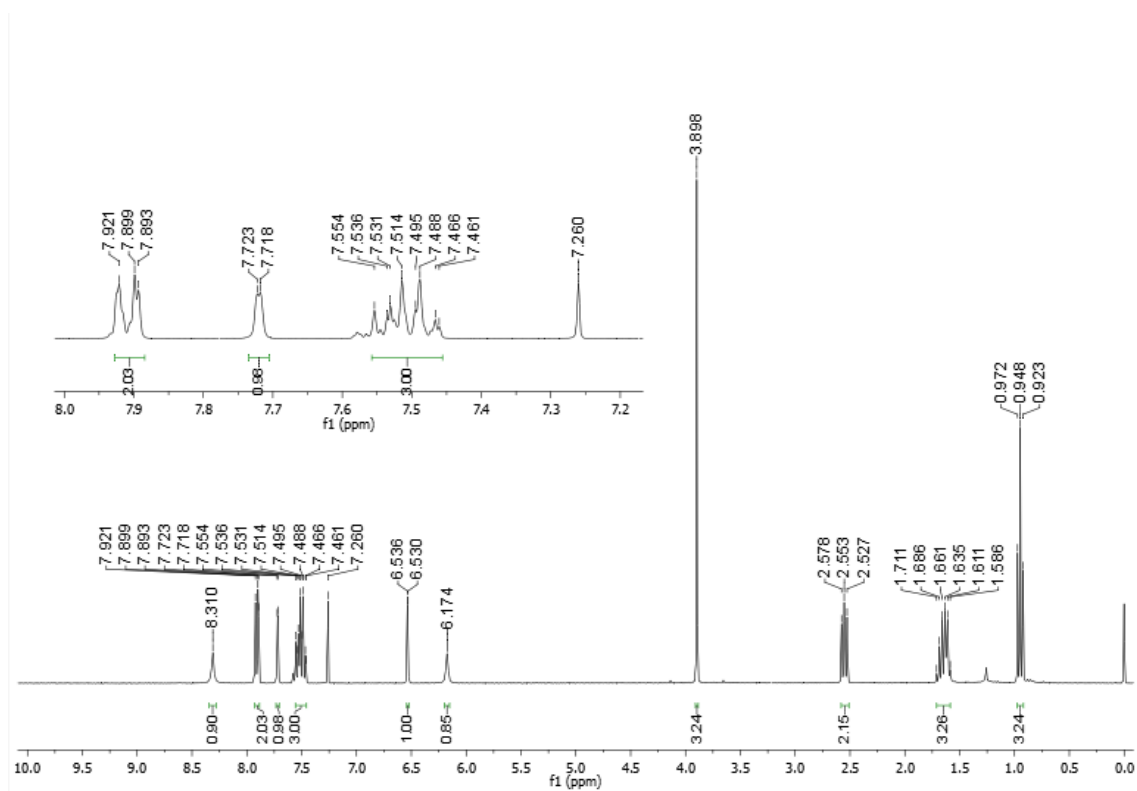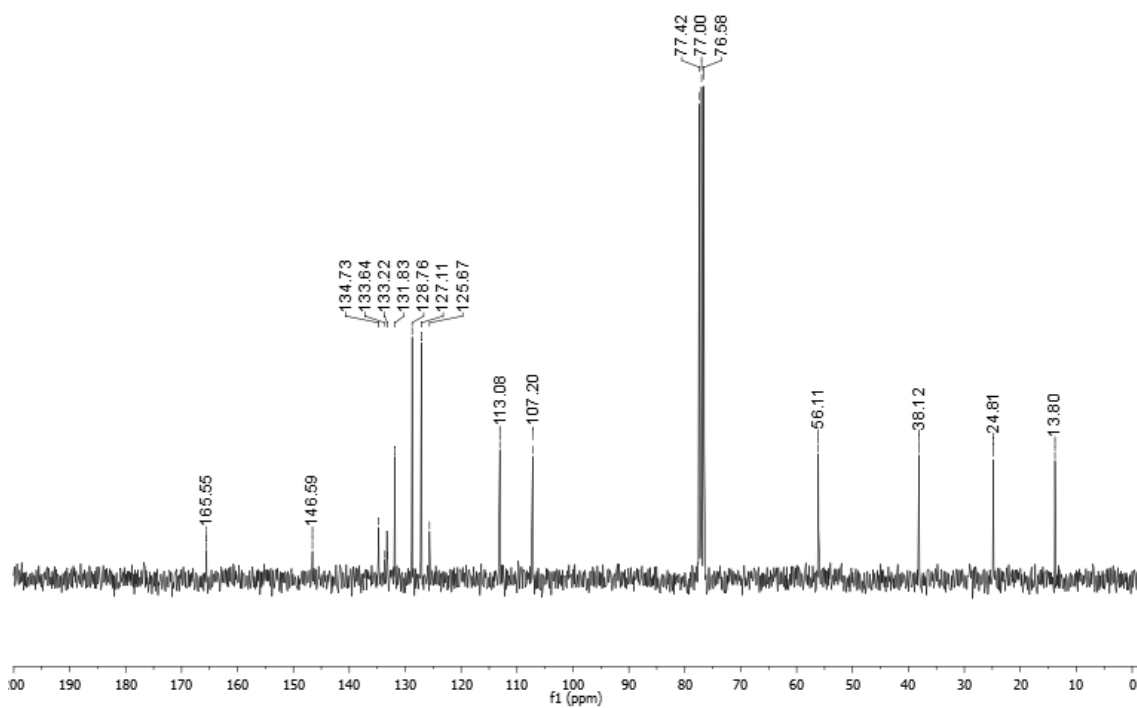



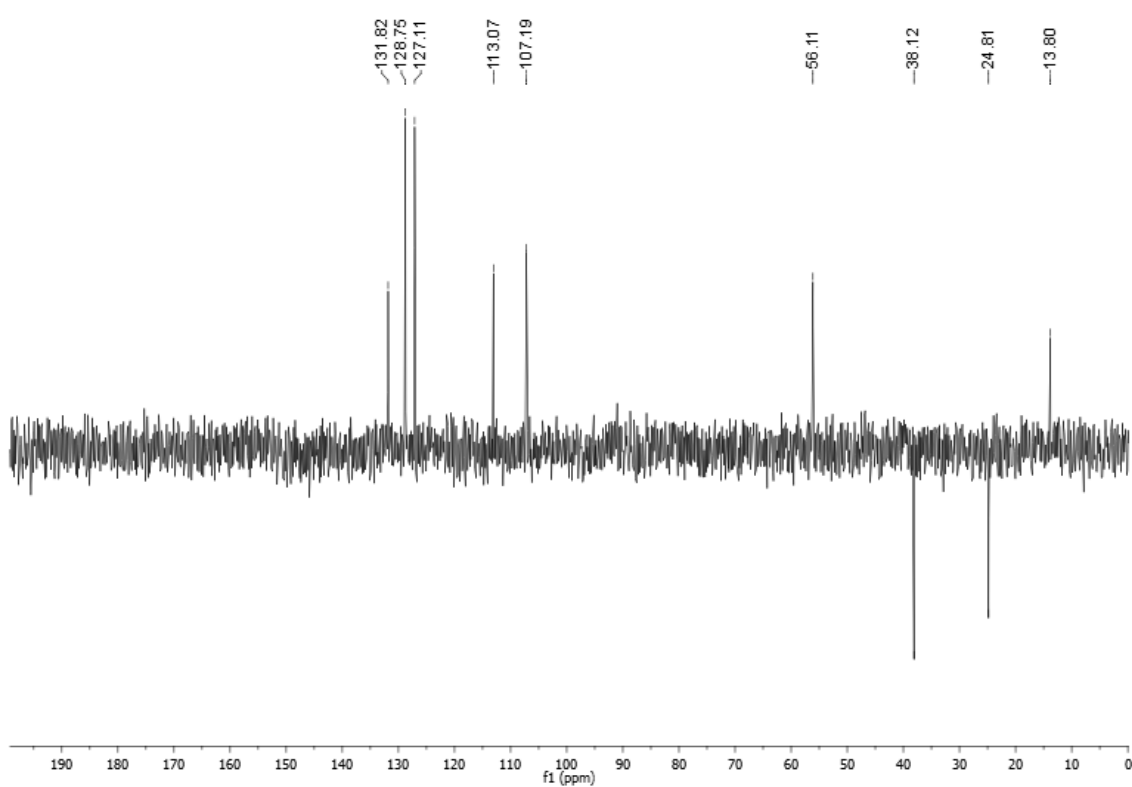

***N*-(2-hydroxy-3-methoxy-5-propylphenyl)-4-chlorobenzamide (4b')**

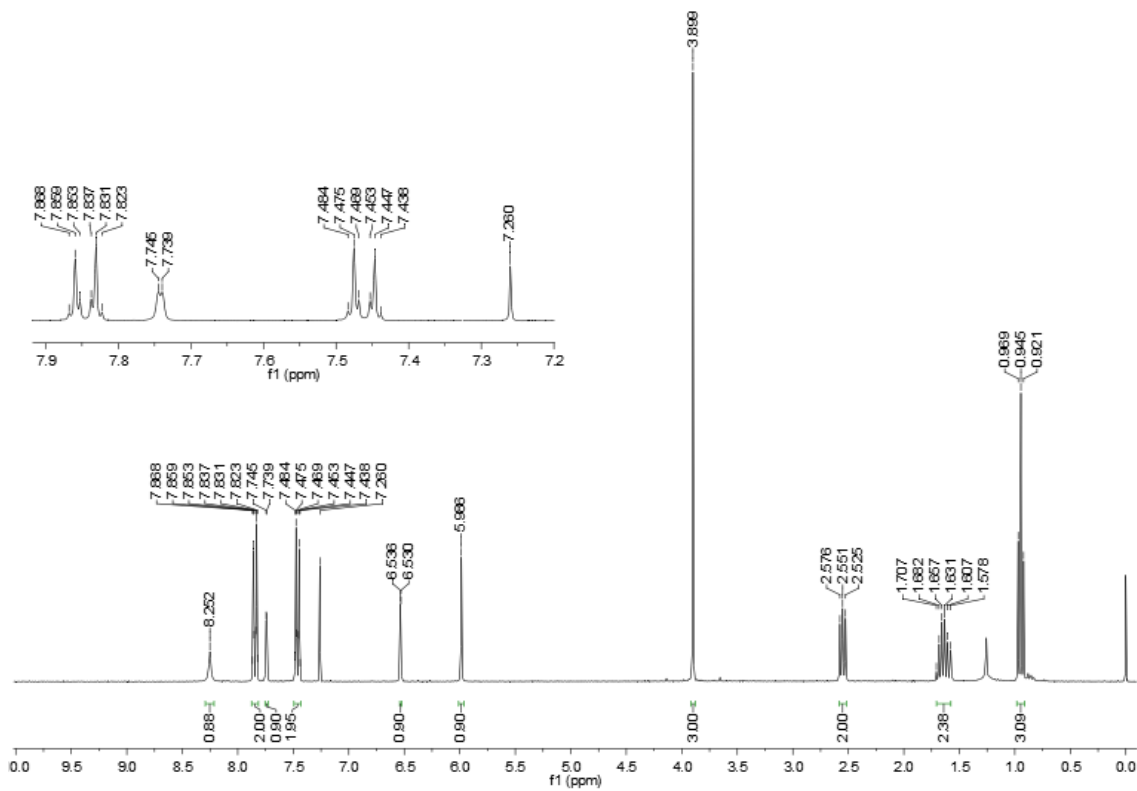

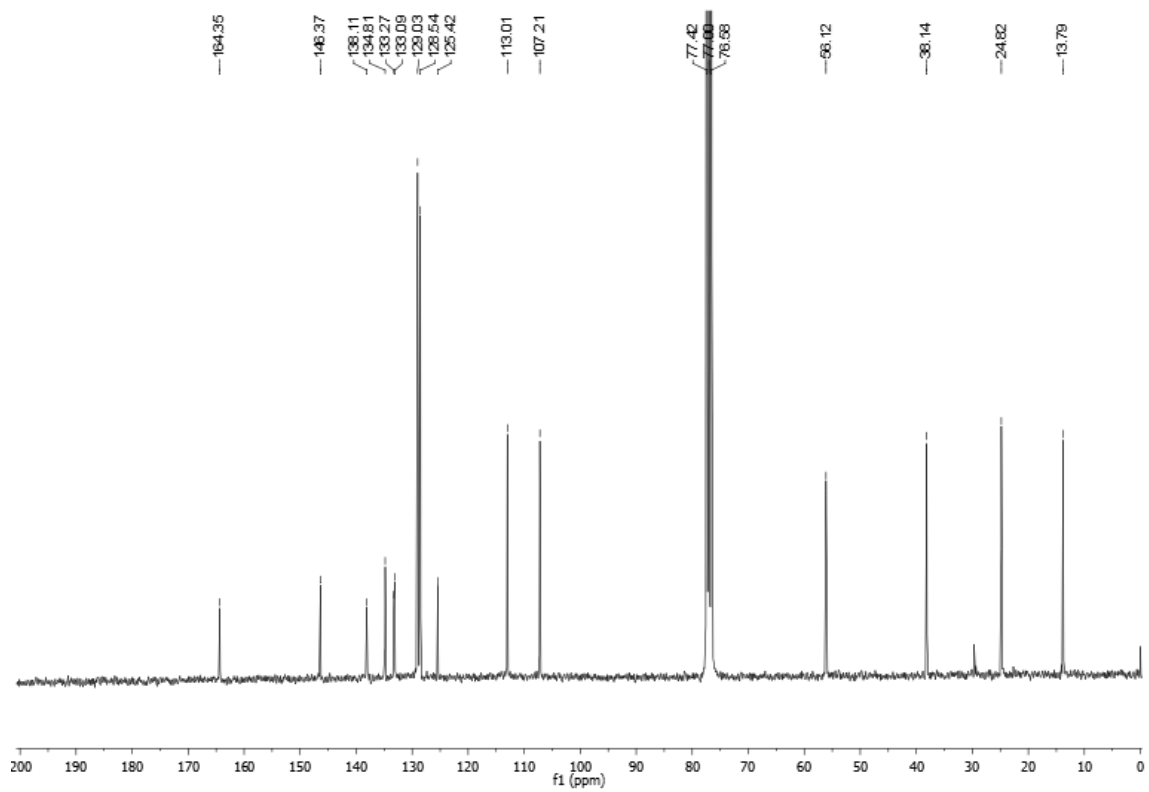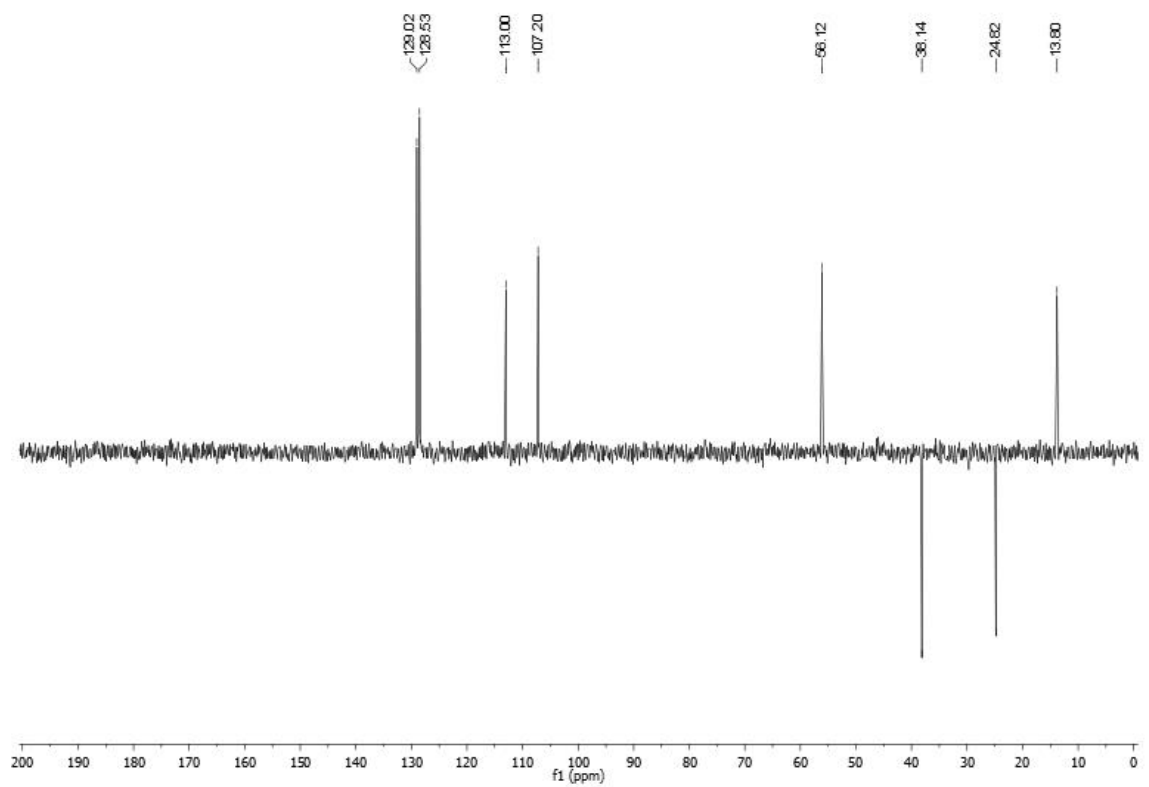

***N*-(2-hydroxy-3-methoxy-5-propylphenyl)-4-methoxybenzamide (4c')**

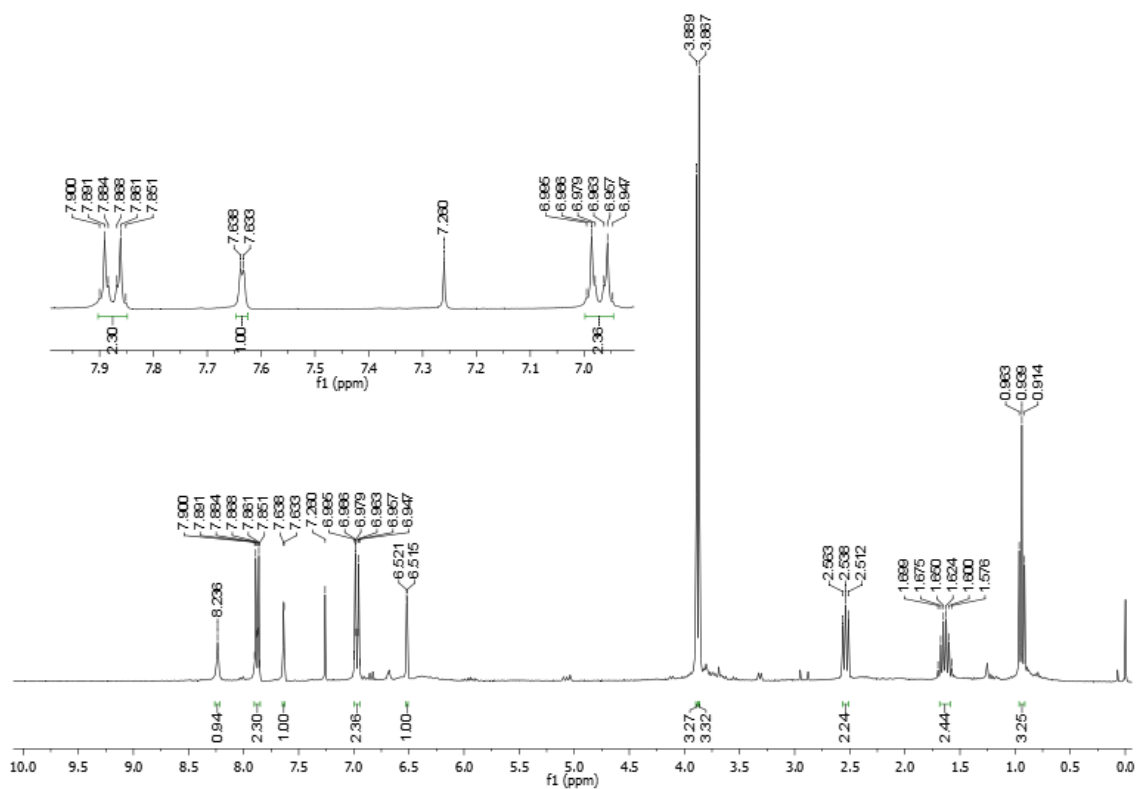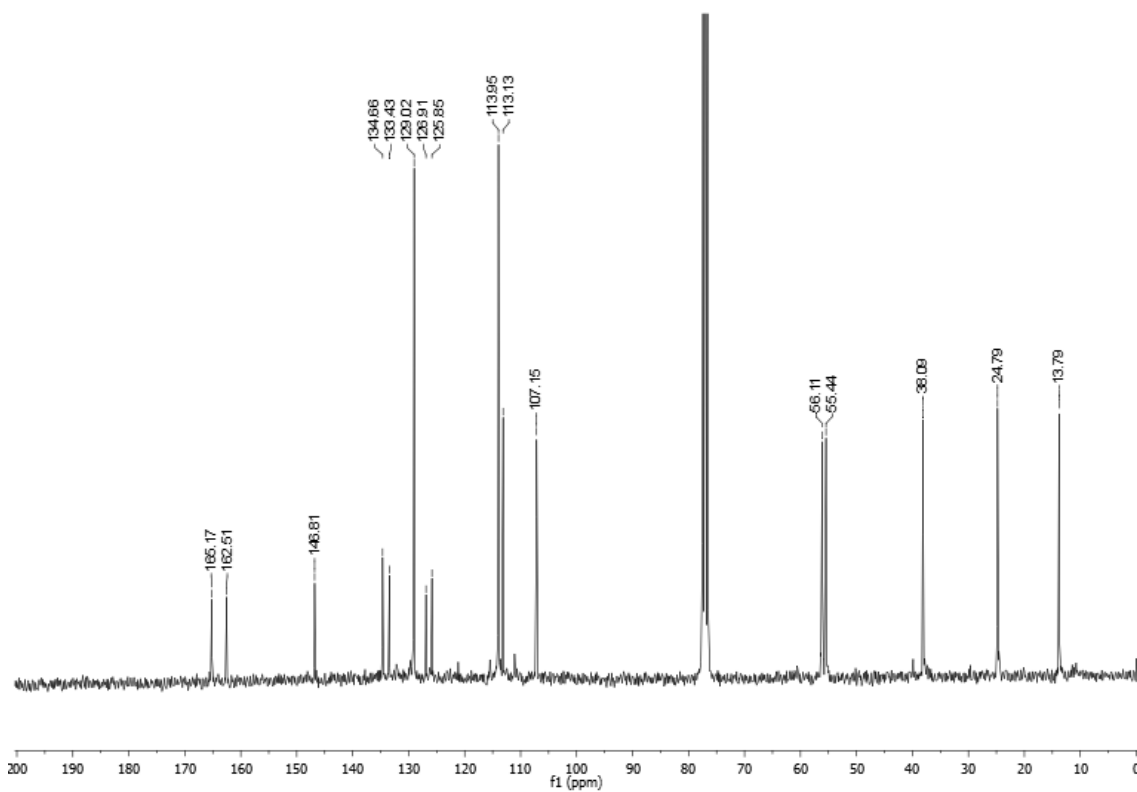

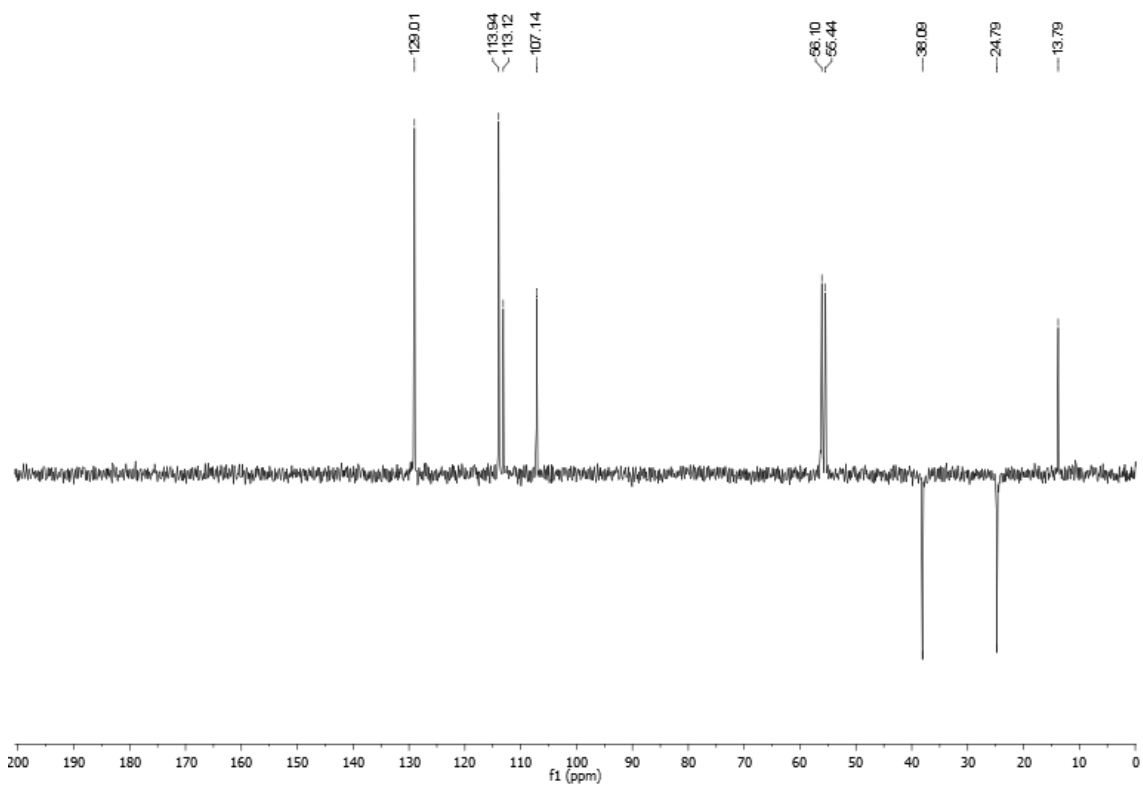

***N*-(2-hydroxy-3-methoxy-5-propylphenyl)-4-nitrobenzamide (4d')**

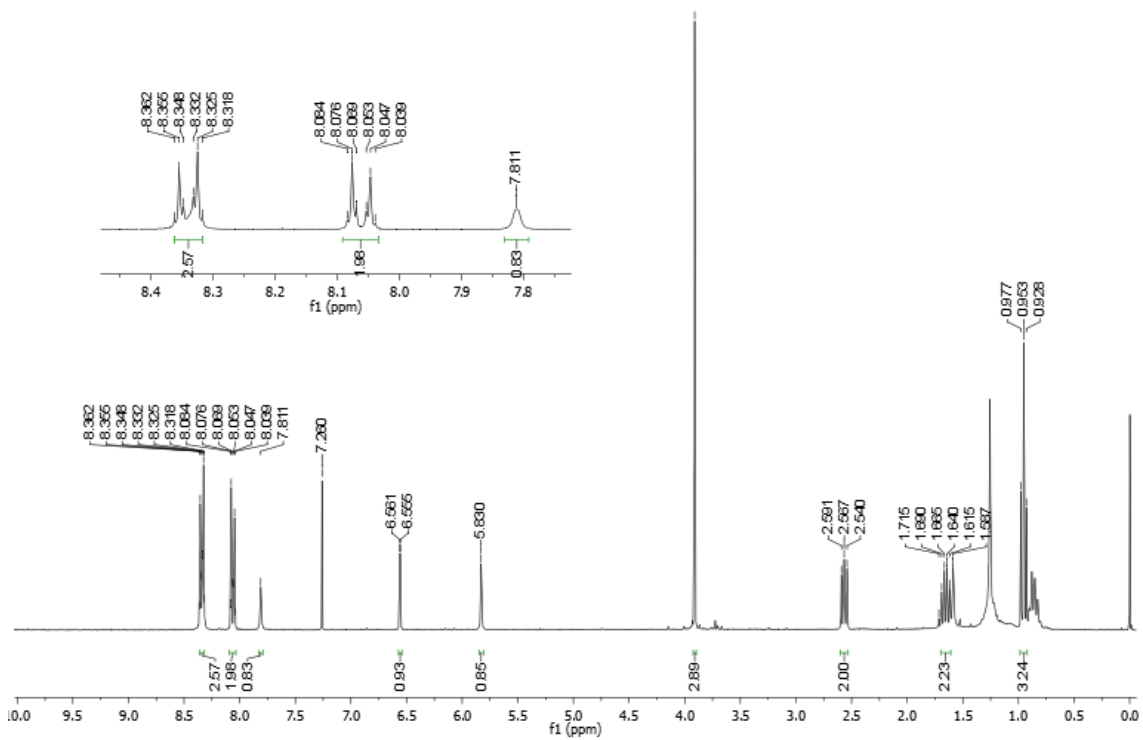

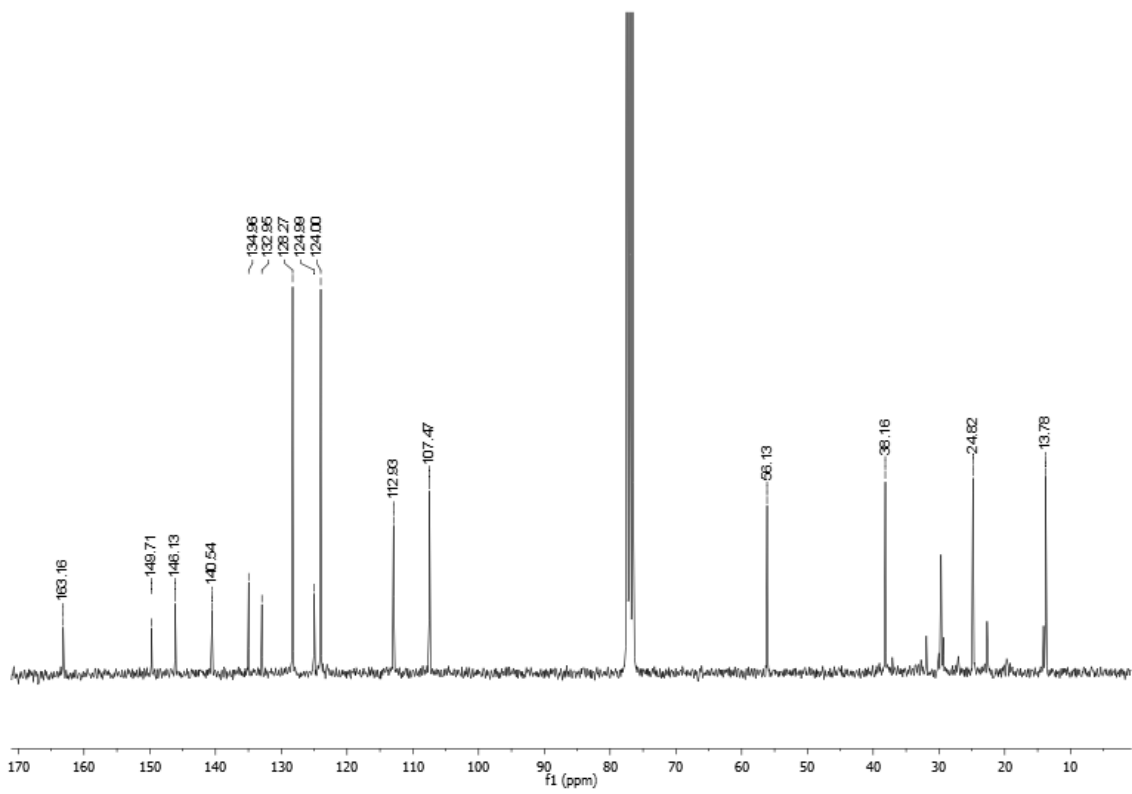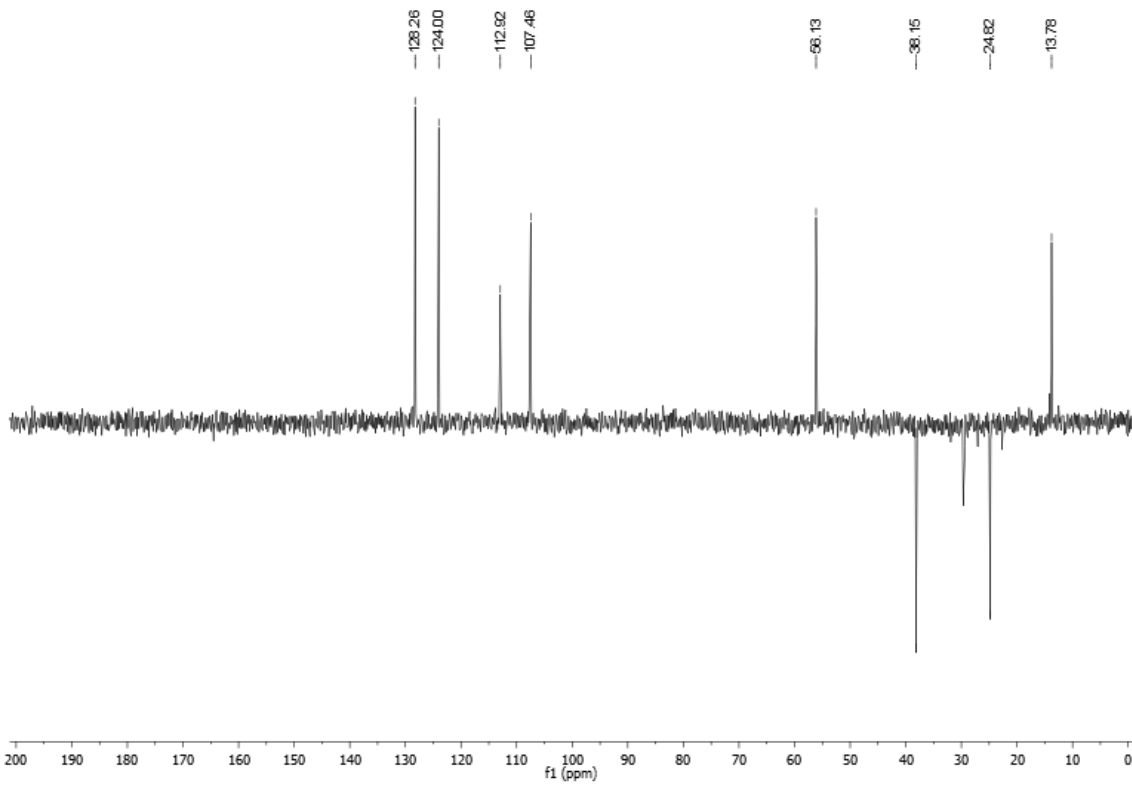

# 5-allyl-7-methoxy-2-phenylbenzo[d]oxazol (5a)

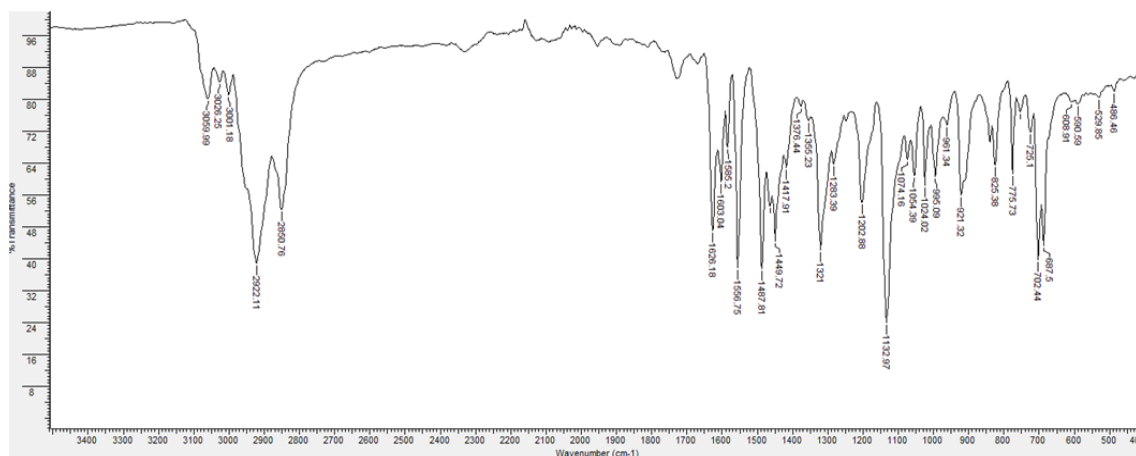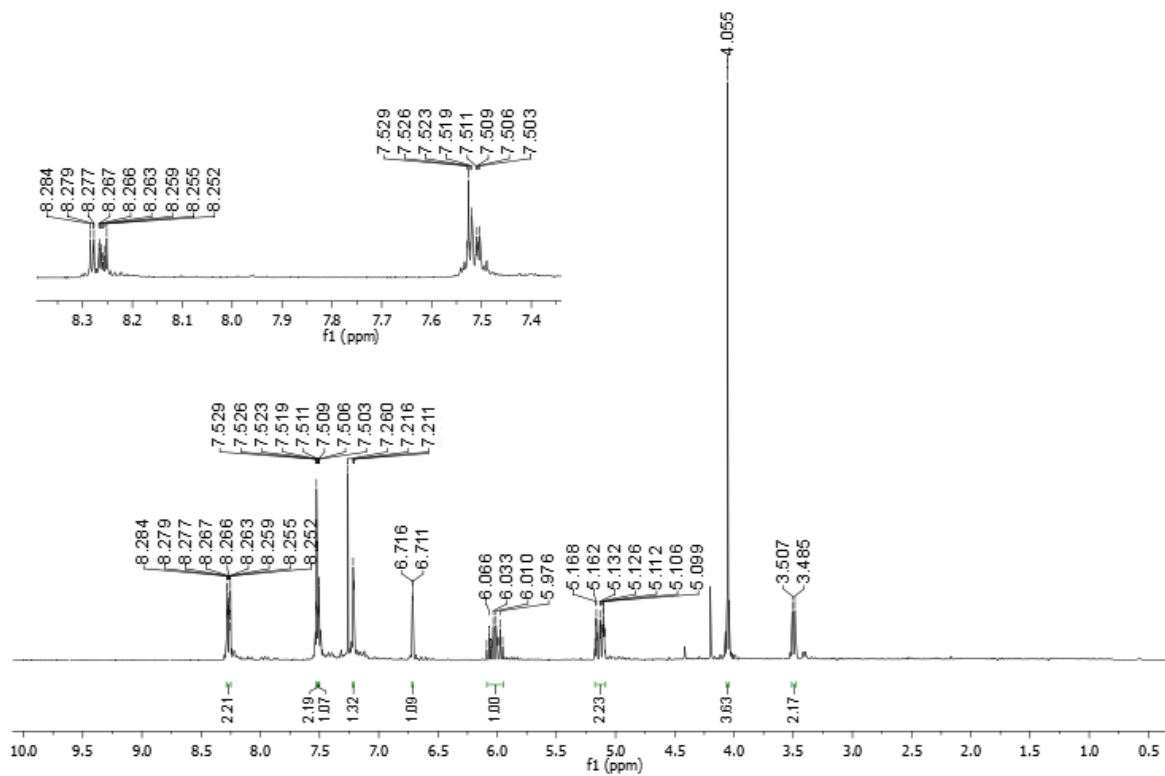

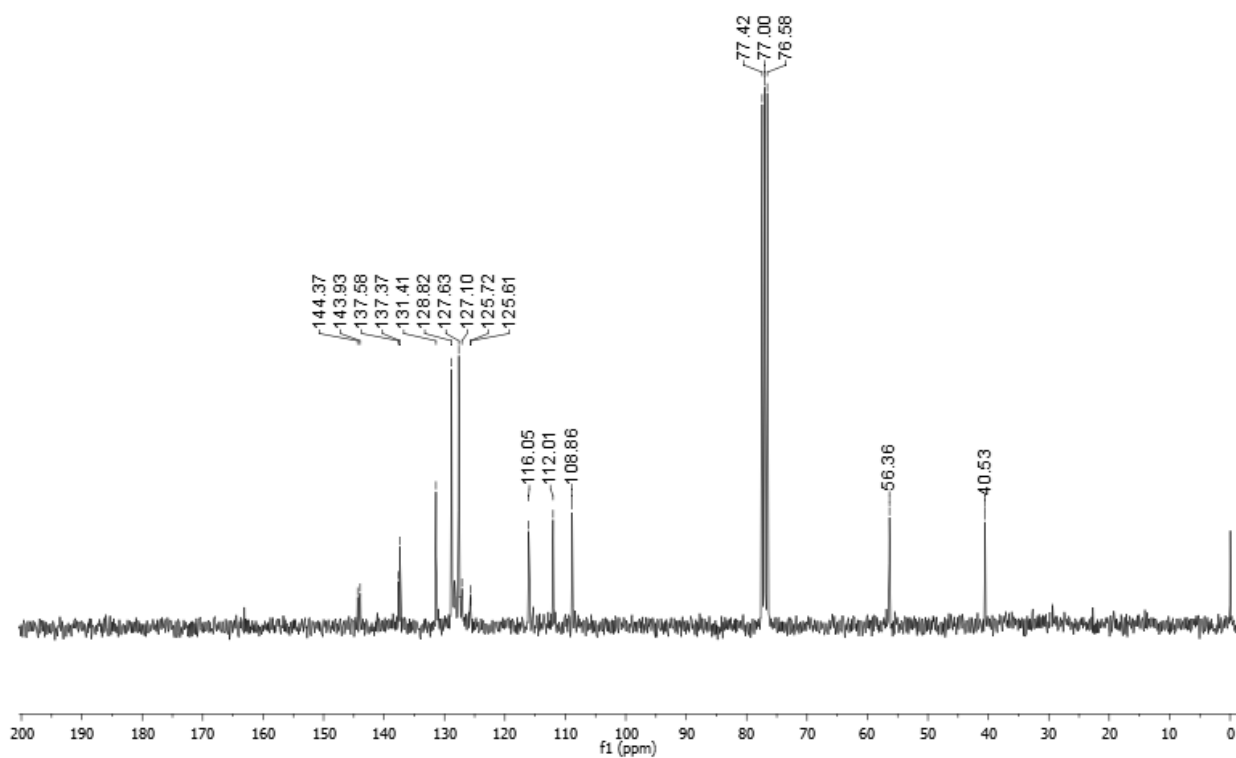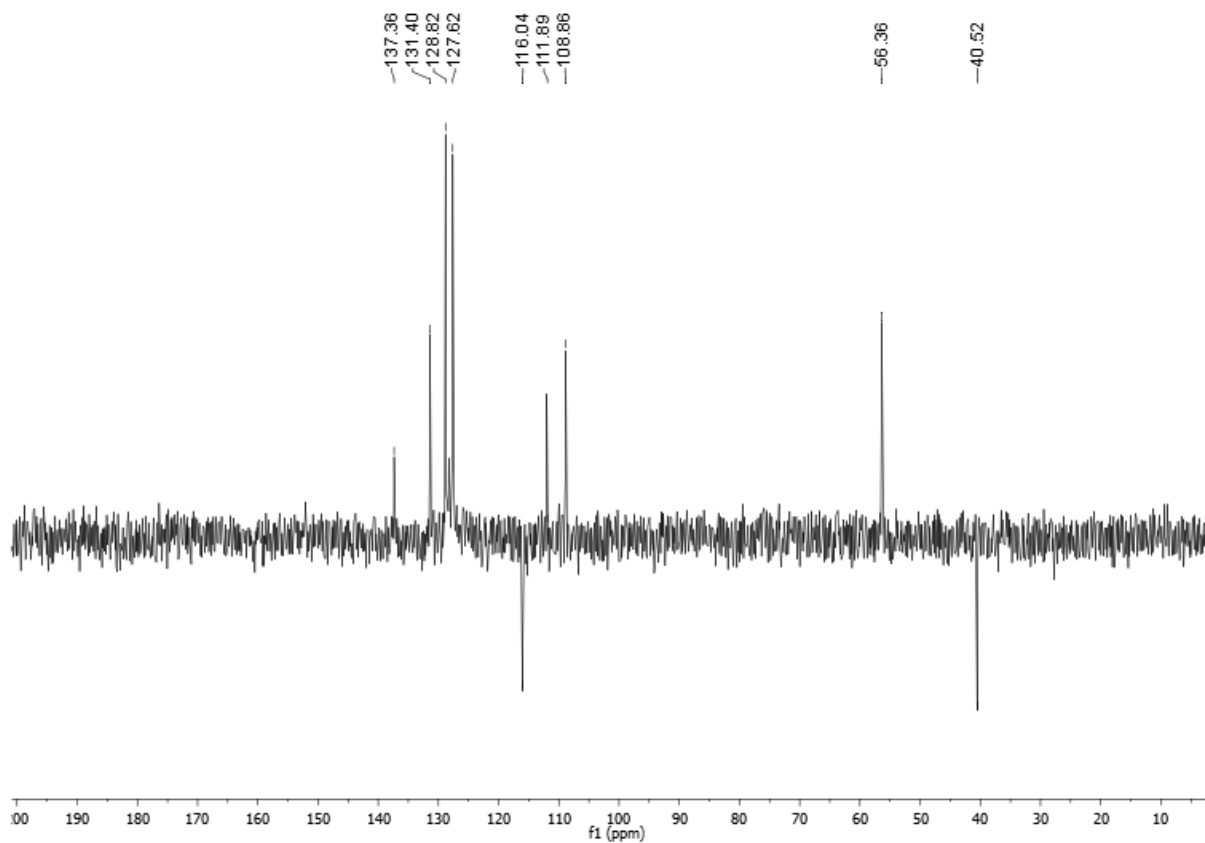

5-allyl-2-(4-chlorophenyl)-7-methoxy-benzo[d]oxazol (5b)

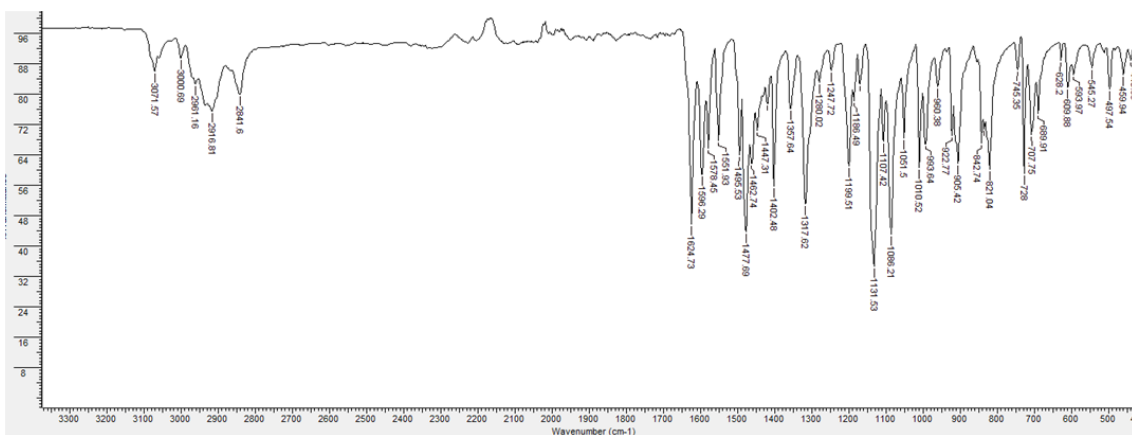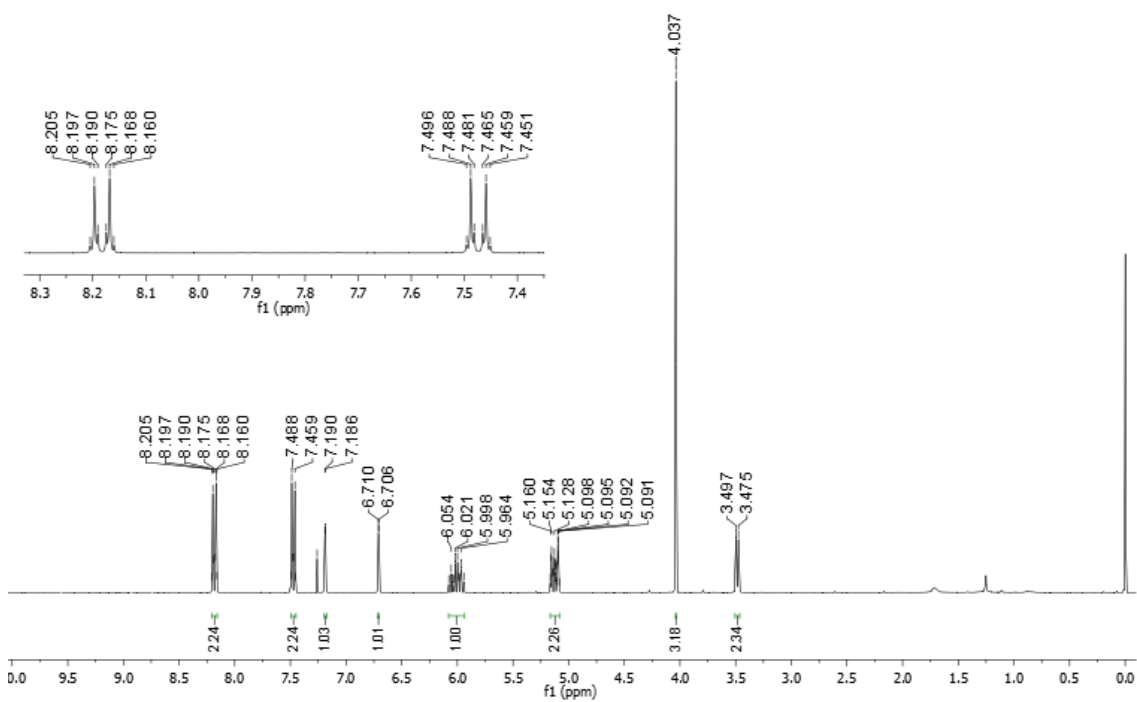



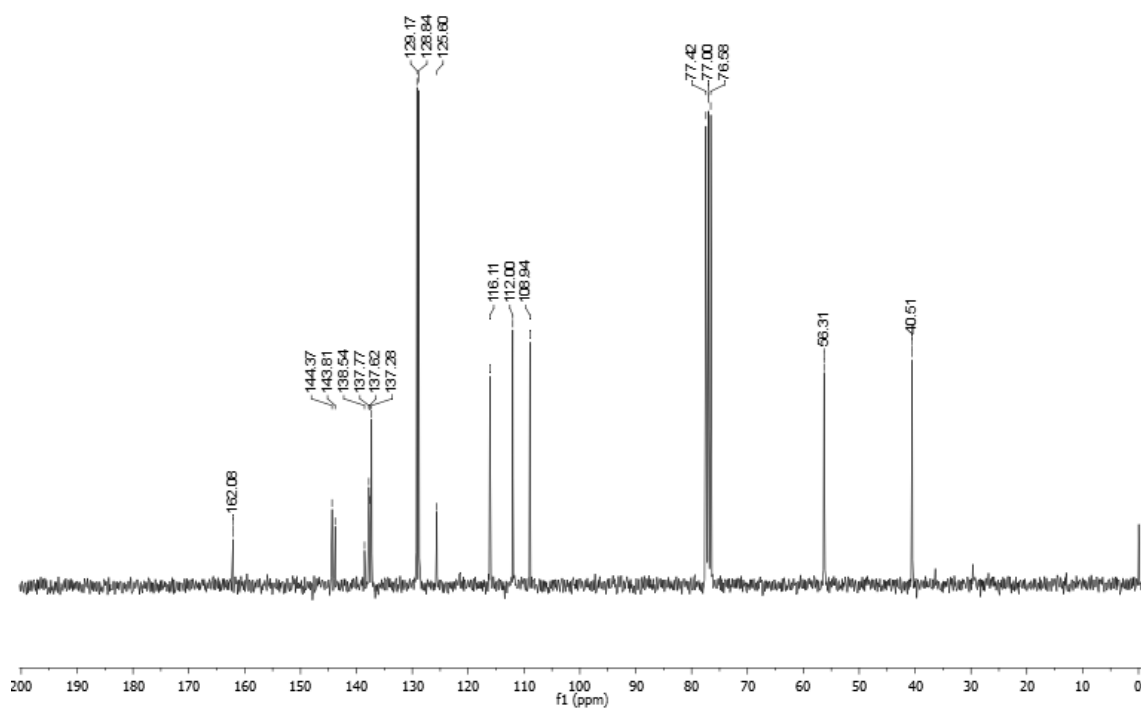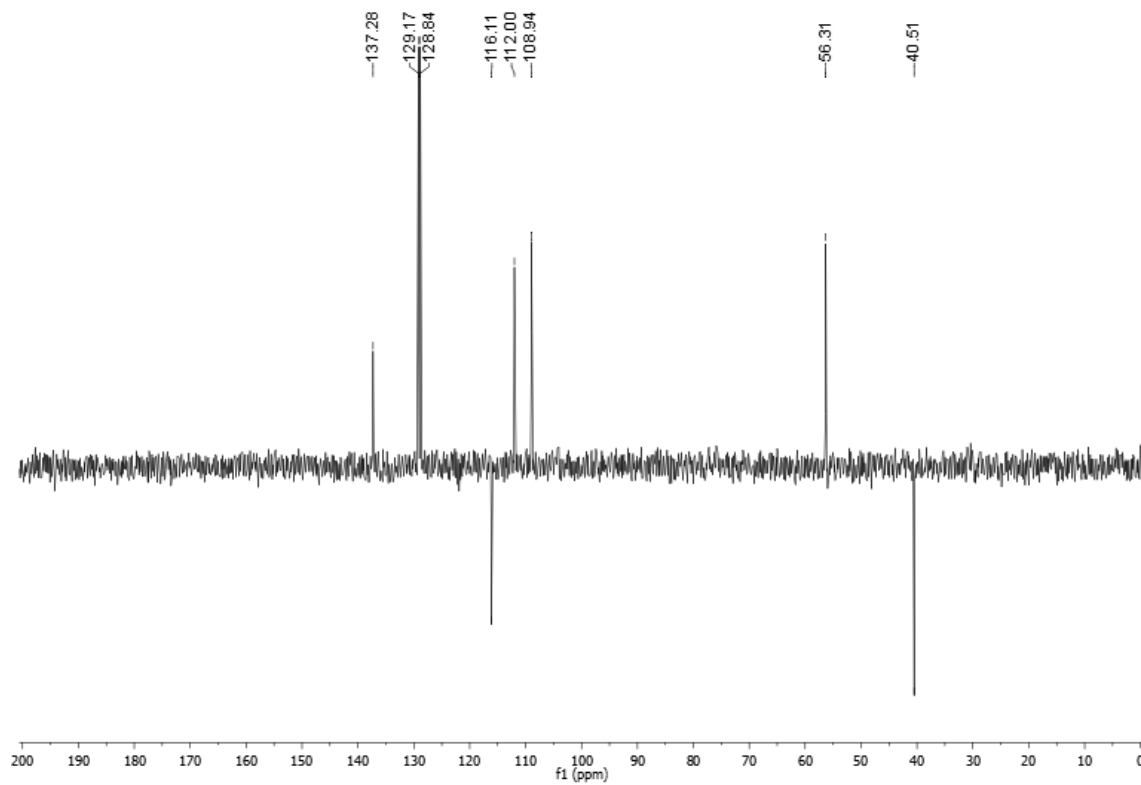

# 5-allyl-7-methoxy-2-(4-methoxyphenyl)benzo[d]oxazol (5c)

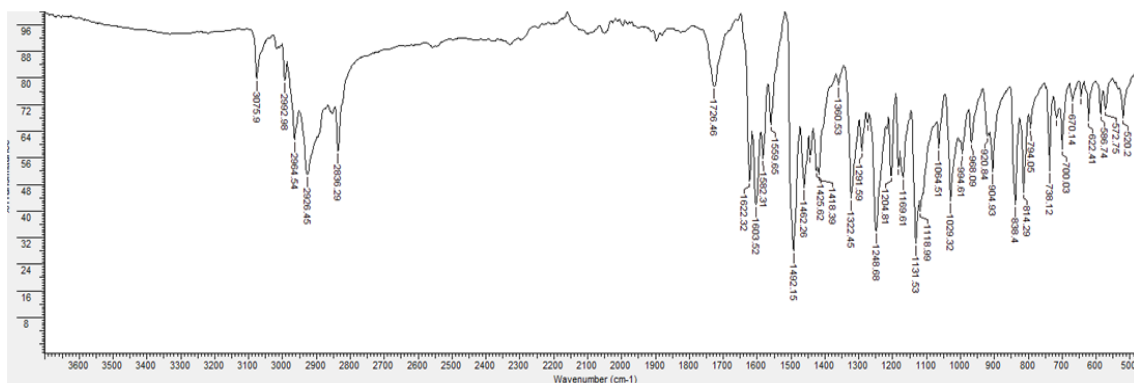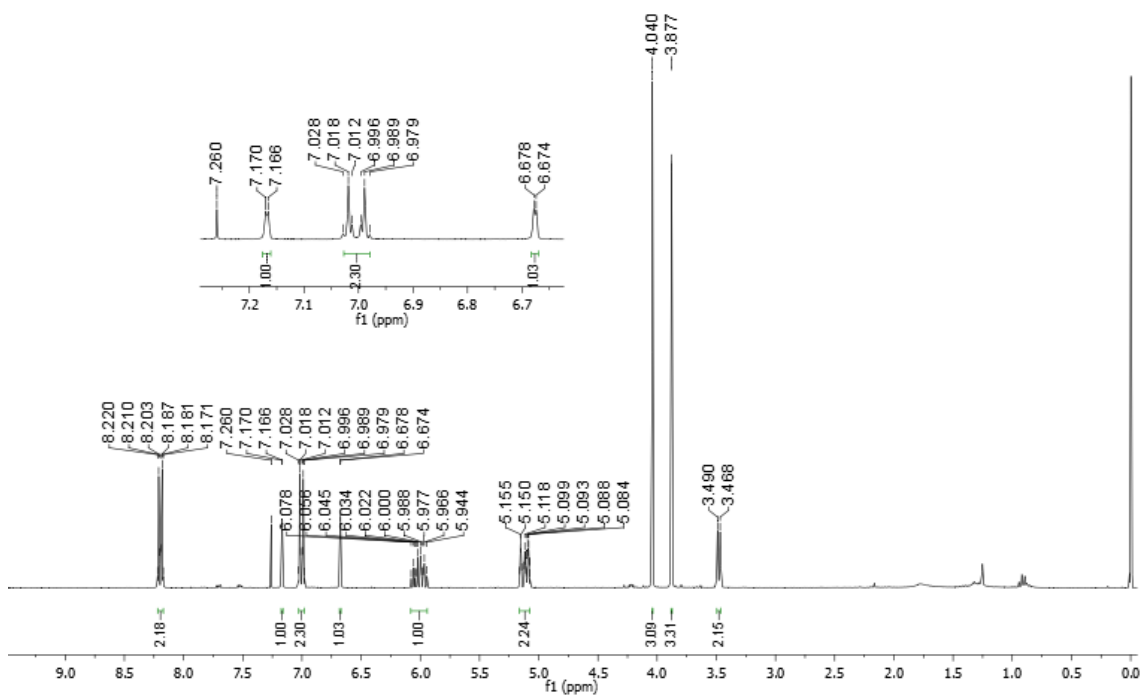

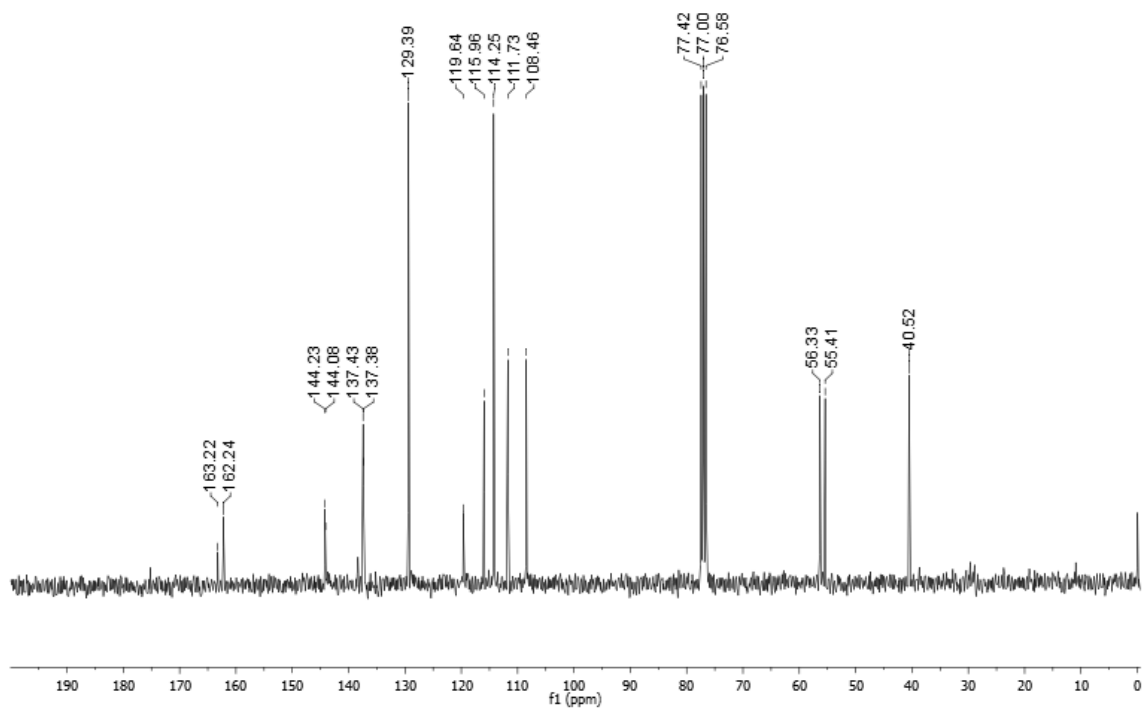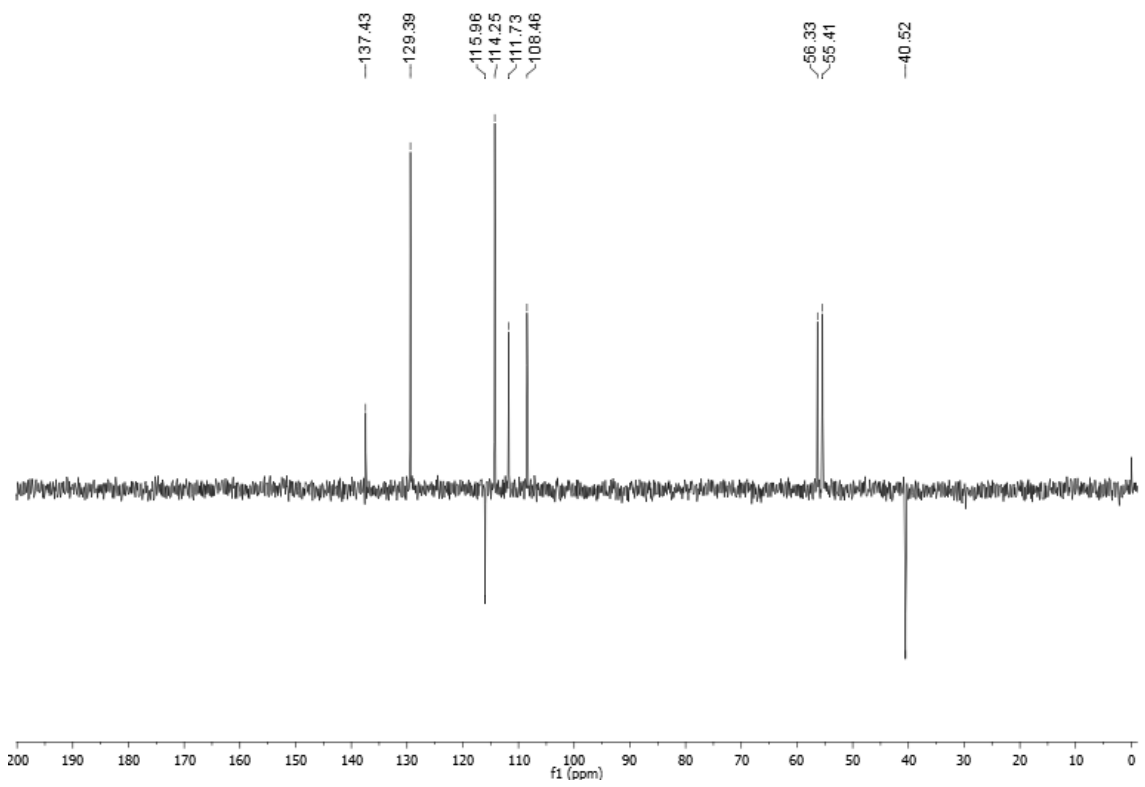

# 5-allyl-7-methoxy-2-(4-nitrophenyl)benzo[d]oxazol (5d)

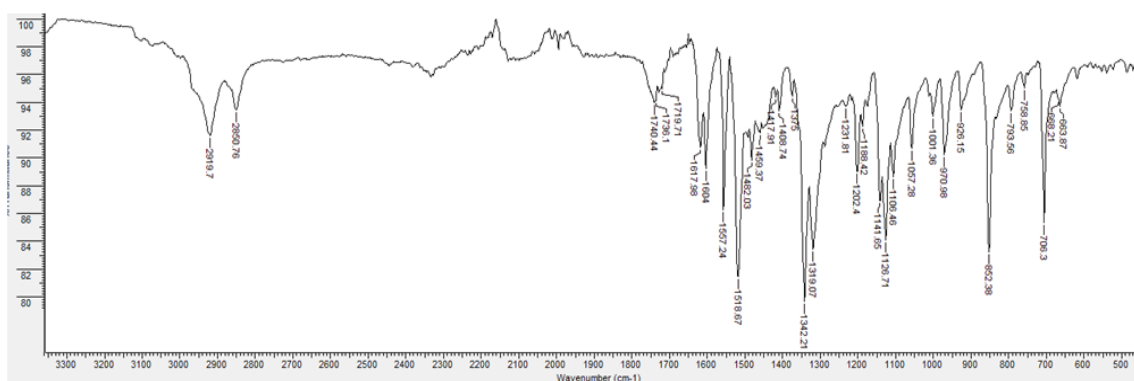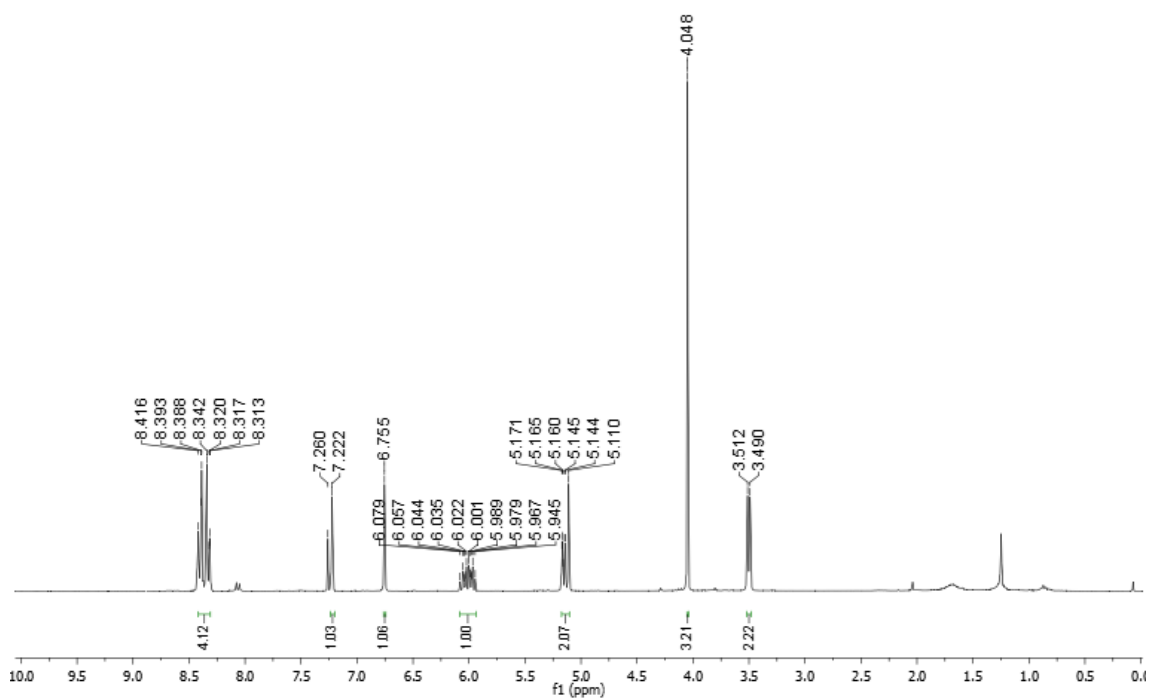

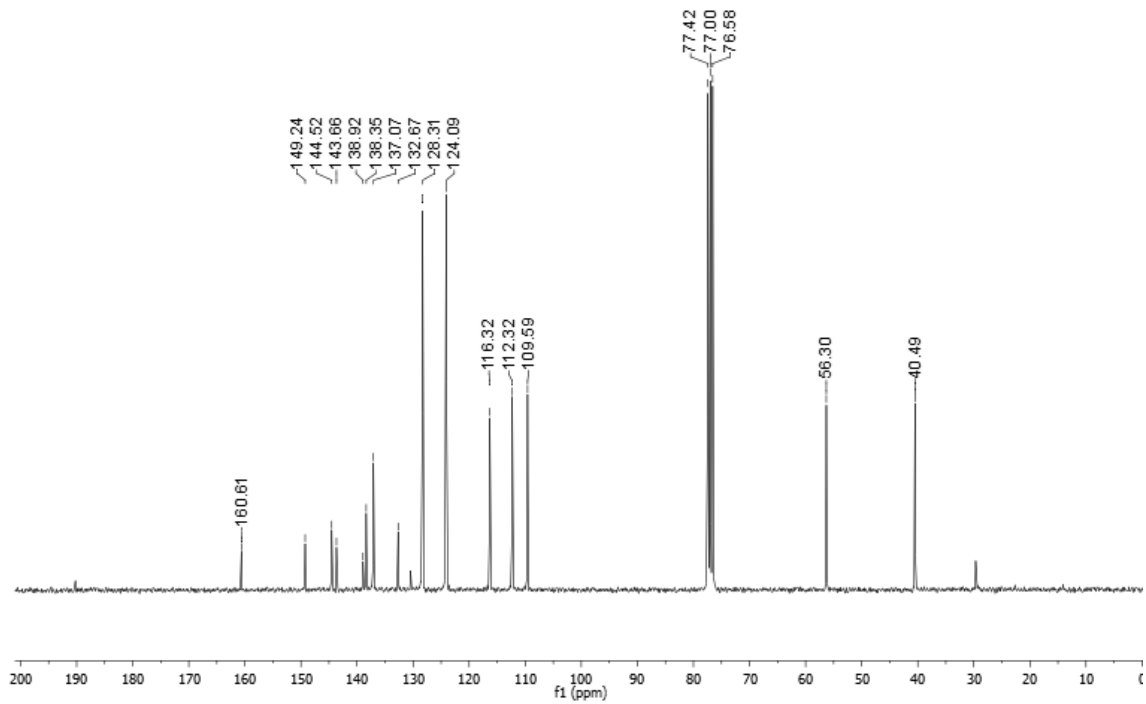

### 7-methoxy-2-phenyl-5-propylbenzo[d]oxazol (5a')

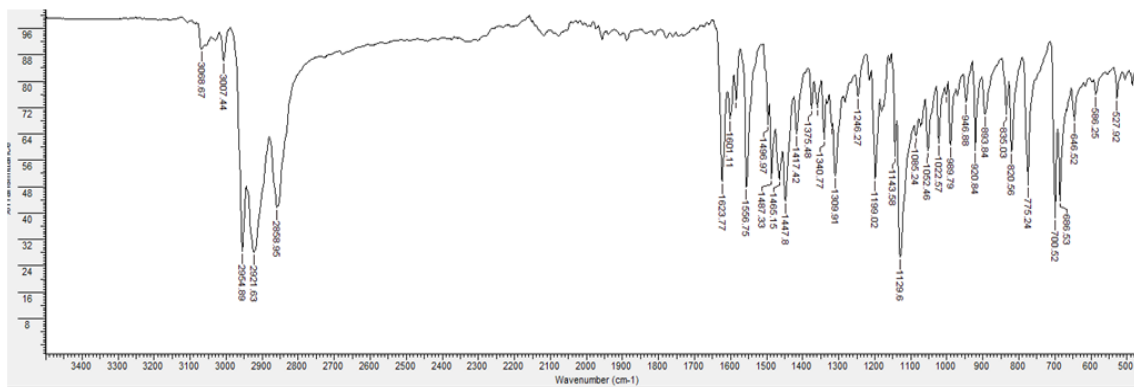

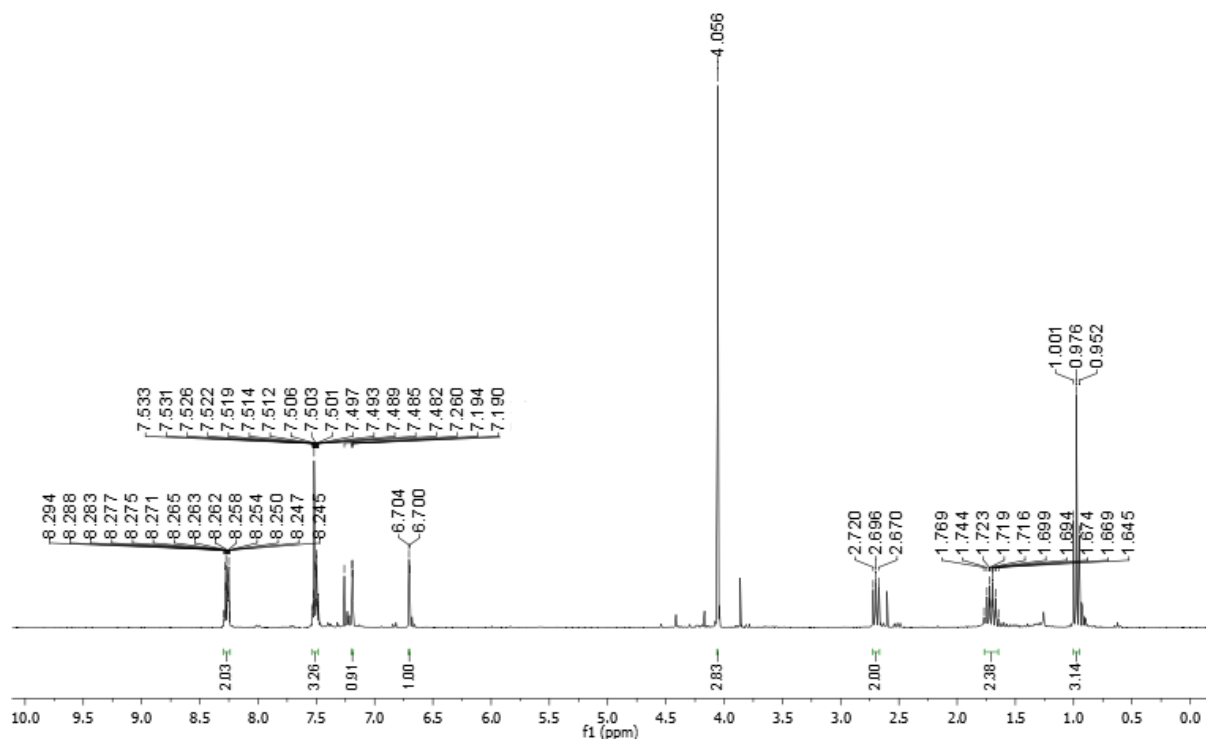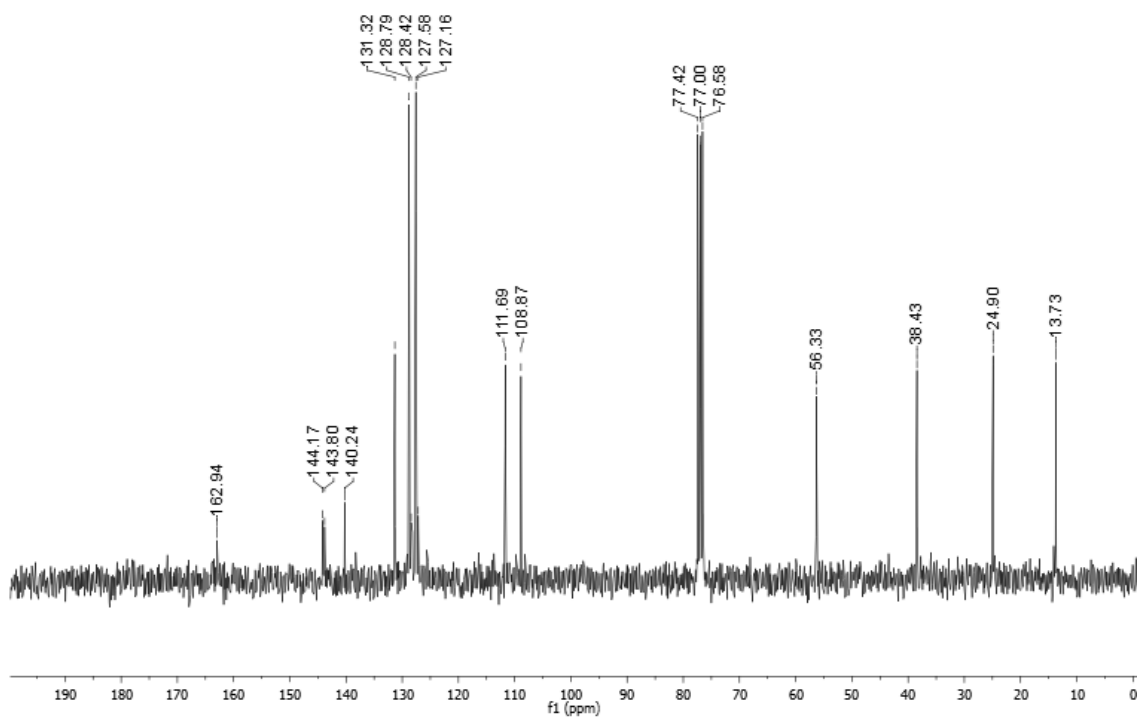

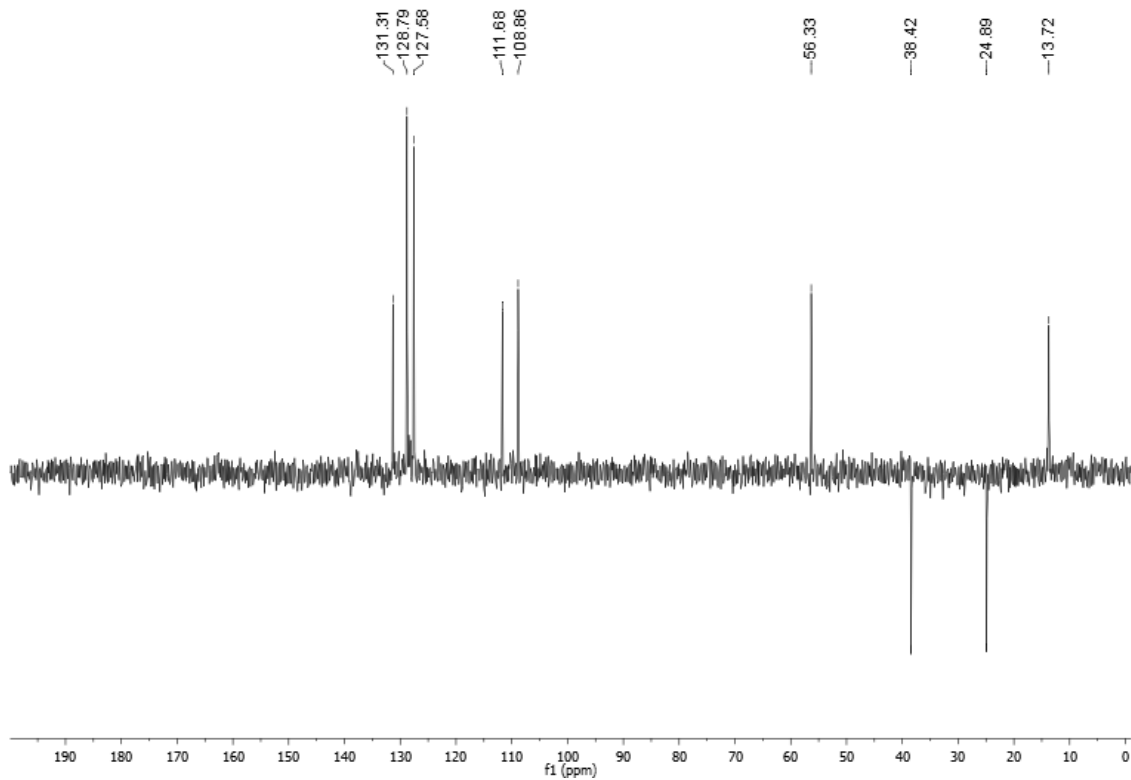

**2-(4-chlorophenyl)-7-methoxy-5-propylbenzo[d]oxazol (5b')**

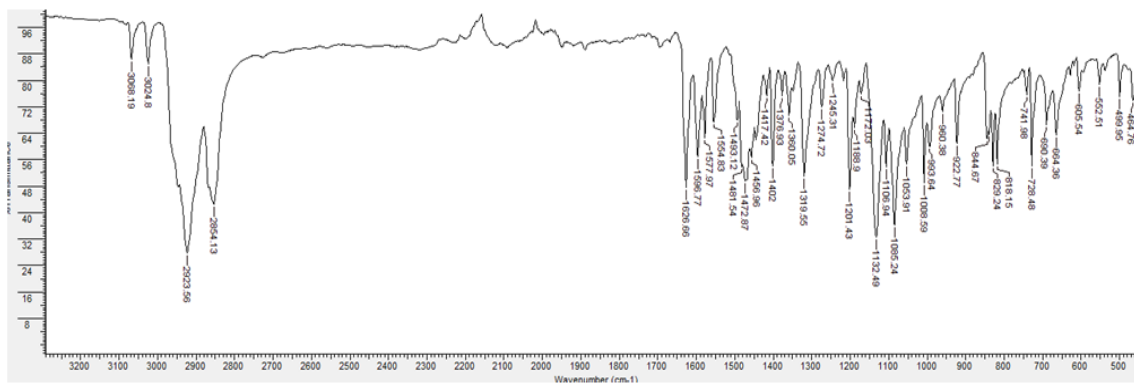

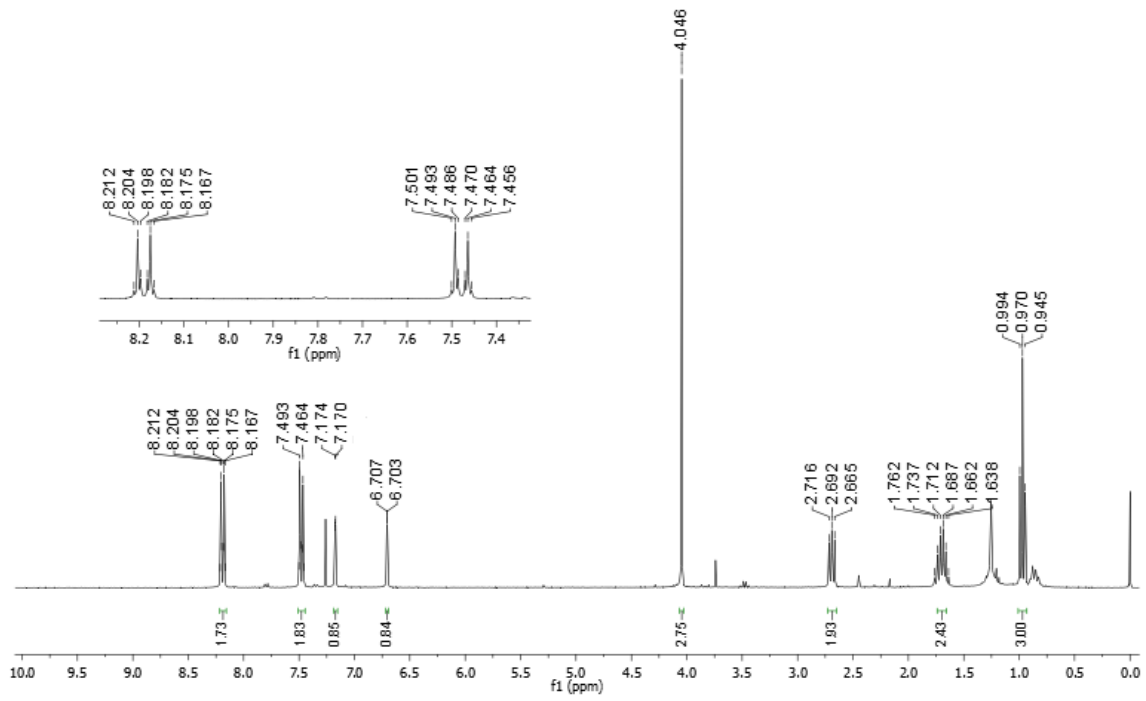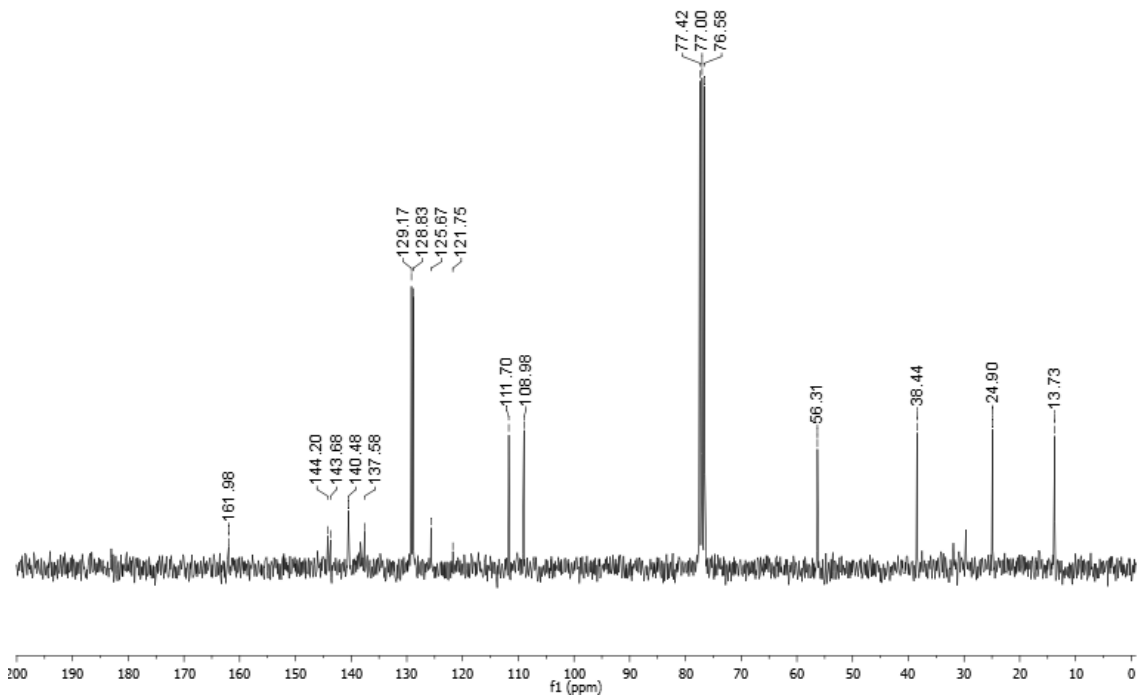



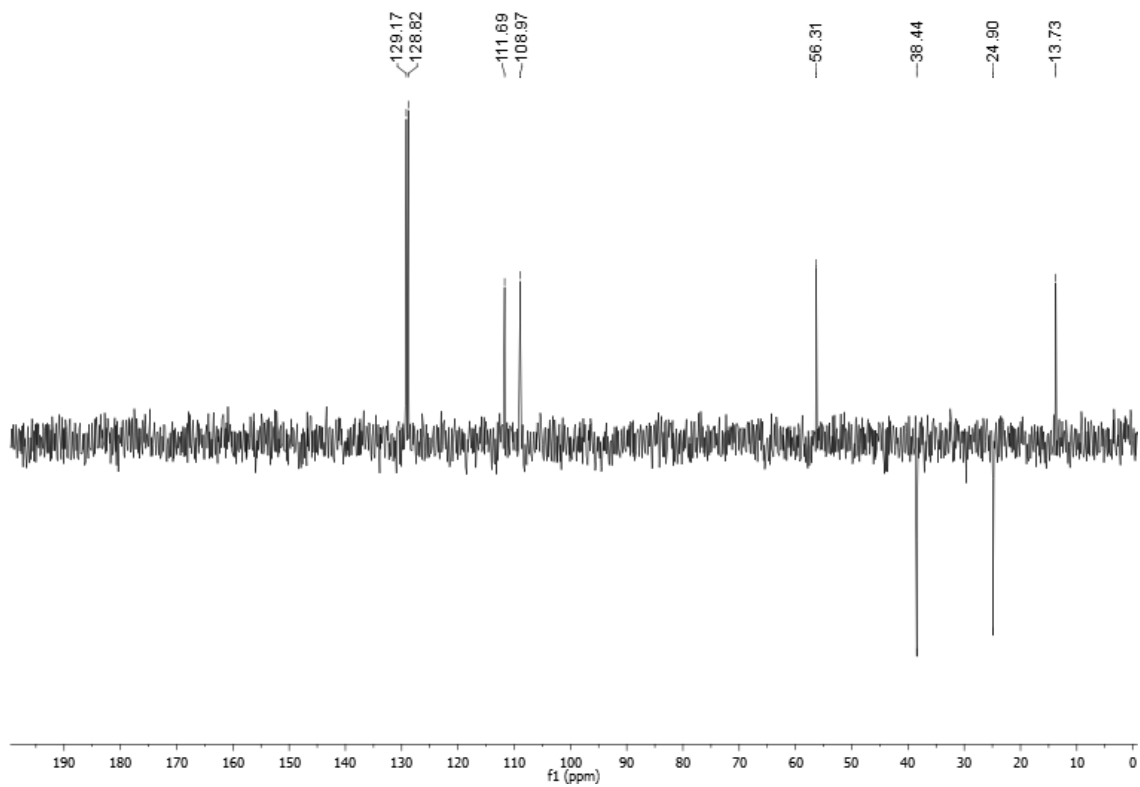

**7-methoxy-2-(4-methoxyphenyl)-5-propylbenzo[d]oxazol (5c')**

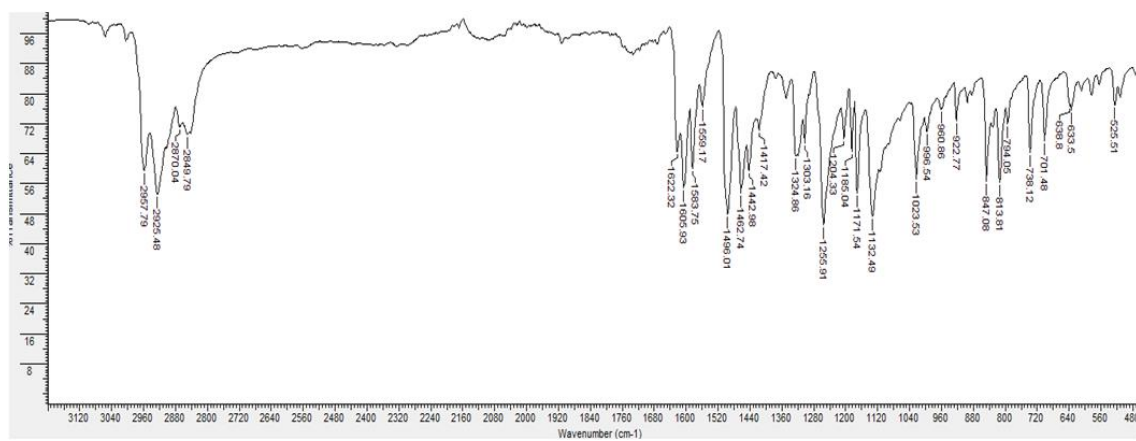

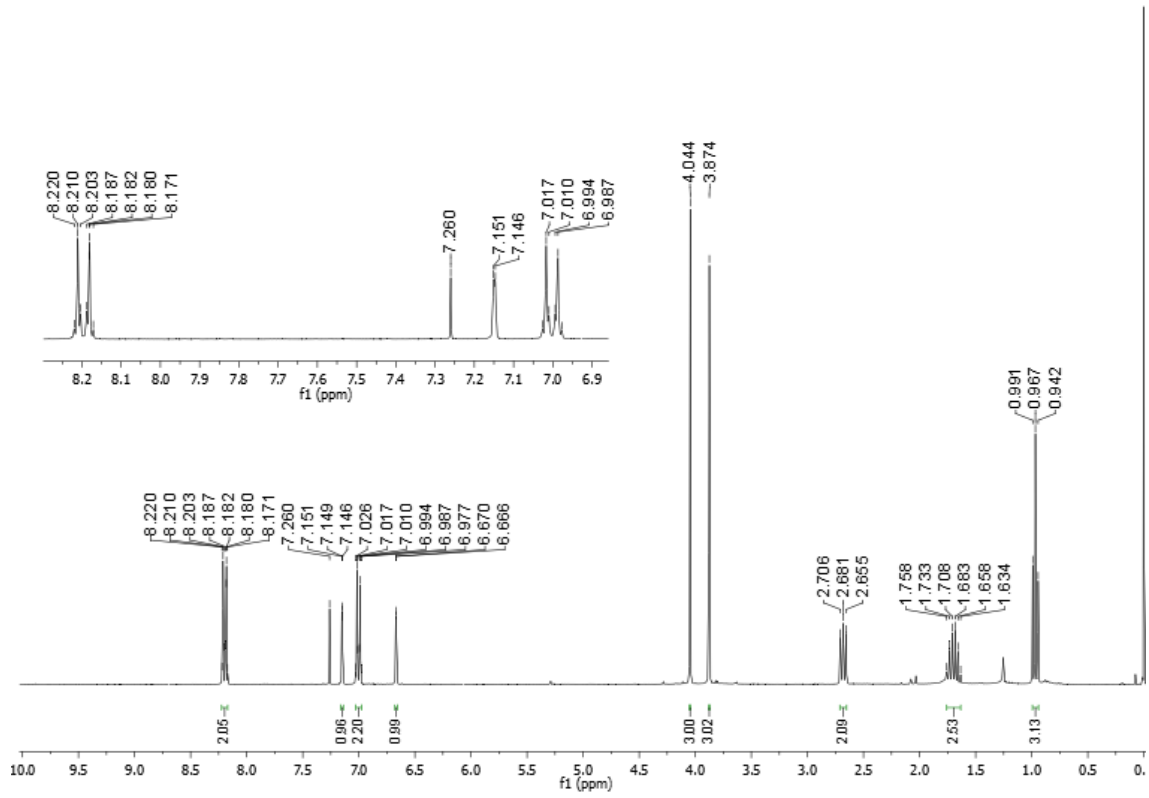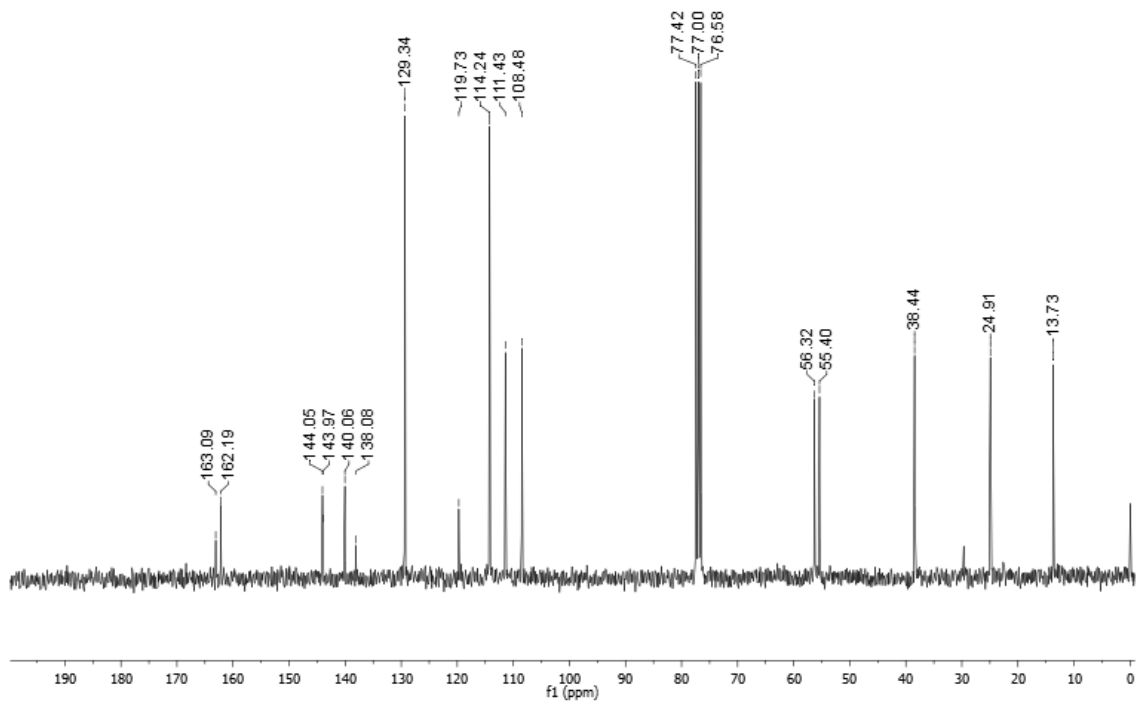

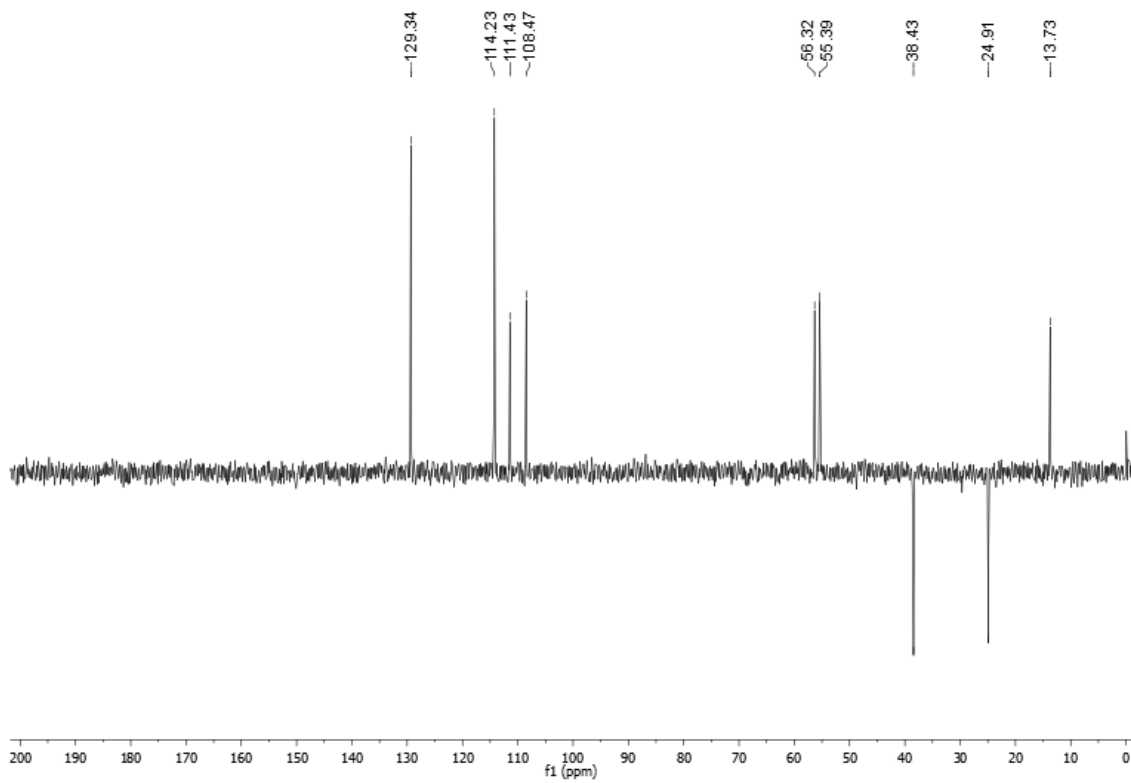

**7-methoxy-2-(4-nitrophenyl)-5-propylbenzo[d]oxazol (5d')**

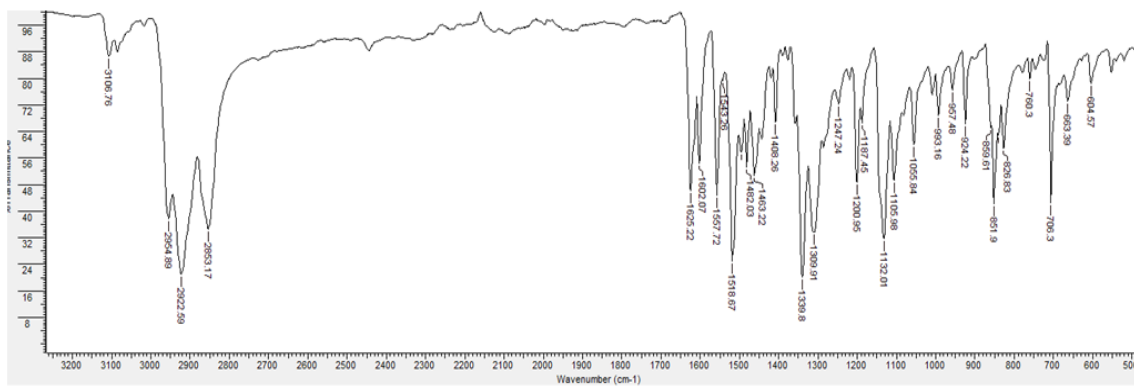

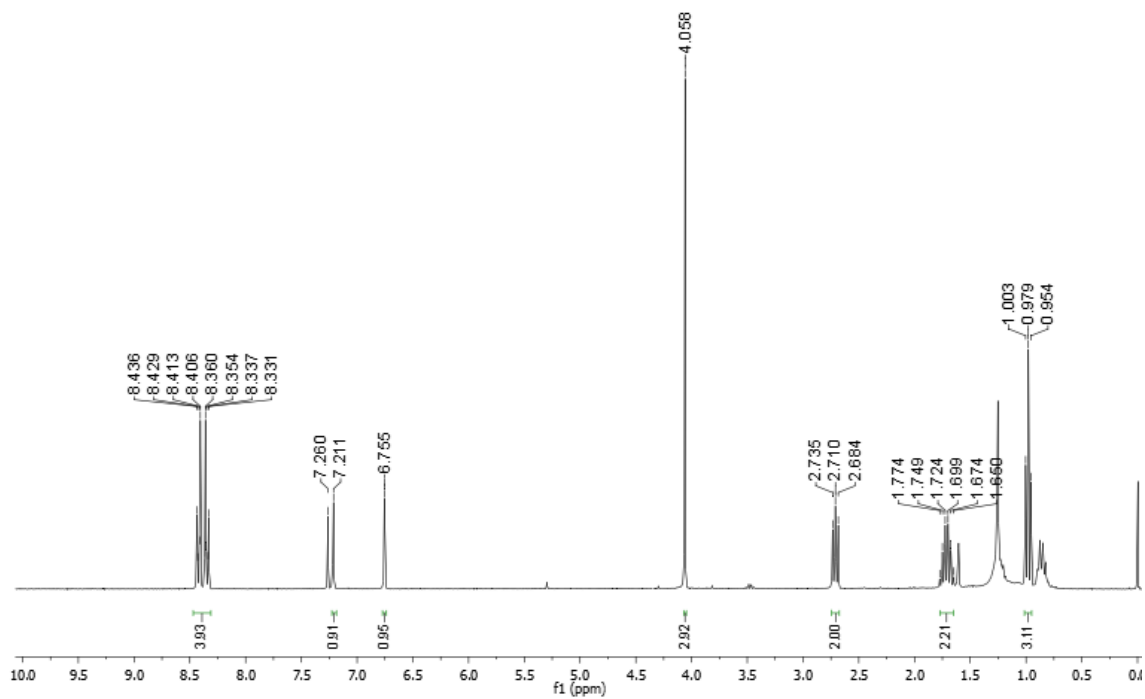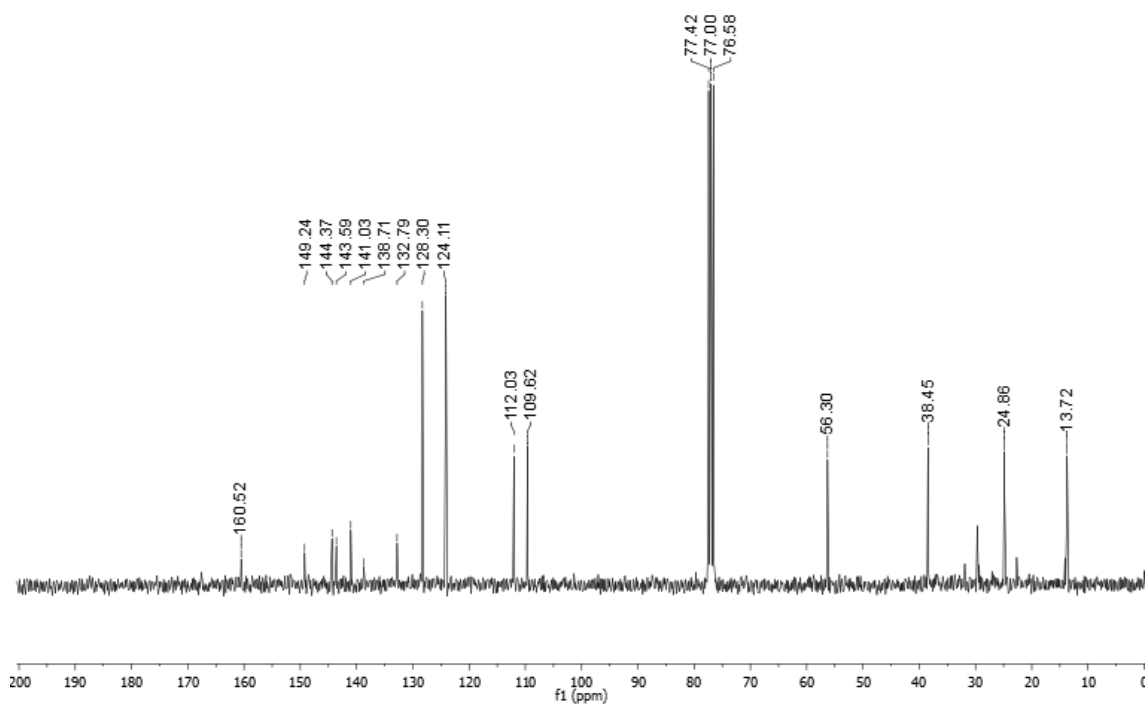

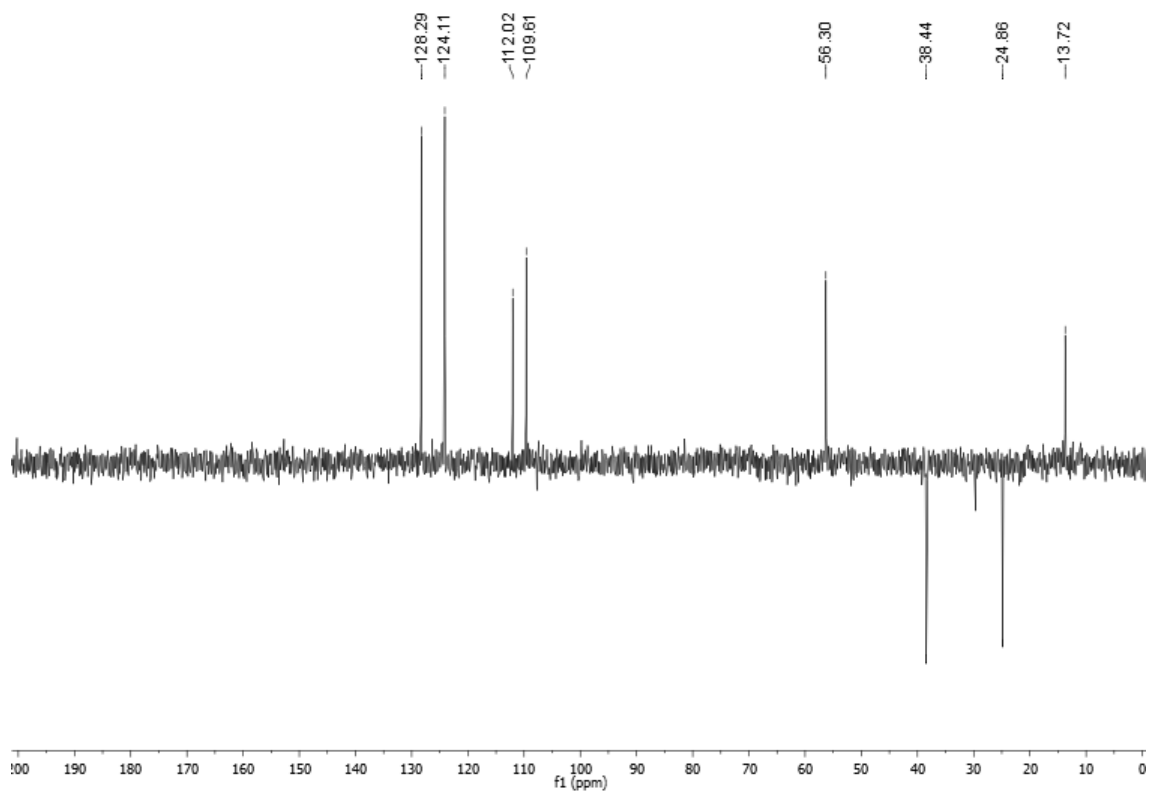

Supplement: f1 [file 5207439.f1.pdf]
